1                   **Cortical waves mediate the cellular response to electric fields**

2           **Authors:** Qixin Yang<sup>1,2</sup>, Yuchuan Miao<sup>3</sup>, Leonard J. Campanello<sup>1,2</sup>, Matt J. Hourwitz<sup>4</sup>, Bedri  
3   Abubaker-Sharif<sup>3</sup>, Abby L. Bull<sup>1,2</sup>, Peter N. Devreotes<sup>3</sup>, John T. Fourkas<sup>2,4</sup>, Wolfgang Losert<sup>1,2\*</sup>.

4   **Affiliations:**

5   <sup>1</sup>Department of Physics, University of Maryland, College Park, MD 20742

6   <sup>2</sup>Institute for Physical Science and Technology, University of Maryland, College Park, MD  
7   20742

8   <sup>3</sup>Department of Cell Biology, Johns Hopkins University, Baltimore, MD 21218

9   <sup>4</sup>Department of Chemistry & Biochemistry, University of Maryland, College Park, MD 20742

10   \*Correspondence to: [wlosert@umd.edu](mailto:wlosert@umd.edu)

11

12

13

14

15

16

17

18

19

20

21

22

23 **Abstract:**

24 Electrotaxis, the directional migration of cells in a constant electric field, is important in  
25 regeneration, development, and wound healing. Electrotaxis has a slower response and a smaller  
26 dynamic range than guidance by other cues, suggesting that the mechanism of electrotaxis share  
27 both similarities and differences with chemical-gradient-sensing pathways. We examined a  
28 mechanism centered on the excitable system consisting of cortical waves of biochemical signals  
29 coupled to cytoskeletal reorganization, which has been implicated in random cell motility. We  
30 use electro-fused giant *Dictyostelium discoideum* cells to decouple waves from cell motion and  
31 employ nanotopographic surfaces to limit wave dimensions and lifetimes. We demonstrate that  
32 wave propagation in these cells is guided by electric fields. The wave area and lifetime gradually  
33 increase in the first 10 minutes after an electric field is turned on, leading to more abundant and  
34 wider protrusions in the cell region nearest the cathode. The wave directions display “U-turn”  
35 behavior upon field reversal, and this switch occurs more quickly on nanotopography. Our  
36 results suggest that electric fields guide cells by controlling waves of signal transduction and  
37 cytoskeletal activity, which underlie cellular protrusions. Whereas surface receptor occupancy  
38 triggers both rapid activation and slower polarization of signaling pathways, electric fields  
39 appear to act primarily on polarization, explaining why cells respond to electric fields more  
40 slowly than to other guidance cues.

41

42 **Introduction**

43 Electrotaxis, which refers to the directed migration of cells under the guidance of an electric field  
44 (EF), is important in wound healing, development, and regeneration (Cortese et al., 2014; Lin et  
45 al., 2008; Zhao et al., 2006). EFs have been shown to cause several key signaling molecules to be

46 distributed asymmetrically across cells (Sato et al., 2009; Zhao et al., 2002, 2006), setting up cell  
47 polarity. The one-order-of-magnitude range of EF strengths sensed by cells (Zhao et al., 2002) is  
48 considerably smaller than the four-orders-of-magnitude concentration sensitivity in chemotaxis  
49 (Harvath et al., 1991). Furthermore, whereas cells respond to chemical guidance cues on a time  
50 scale of seconds and develop polarity over several minutes, the response to EFs can take up to 10  
51 minutes or more after the EF is turned on (Wang et al., 2014; Zhao et al., 2006). These  
52 differences raise the possibility that the rapid gradient sensing mechanisms do not serve as  
53 primary mediators of EF sensing by cells. In this study, we examine whether, after turning on an  
54 EF, the gradual polarization of the excitable biochemical networks that organize actin  
55 polymerization comprises a slow-acting mediator of the cellular response to the EF.

56  
57 Actin polymerization, coordinated with its associated signaling molecules, self-organizes into  
58 microscale spatial regions that travel as waves across plasma membranes. These waves drive  
59 various cell behaviors, such as migration and division (Bhattacharya et al., 2019; Bretschneider  
60 et al., 2009; Flemming et al., 2020; Gerhardt et al., 2014; Gerisch, 2010). The wave system can  
61 be described as a coupled signal transduction excitable network - cytoskeletal excitable network  
62 (STEN-CEN) (Devreotes et al., 2017; Miao et al., 2019). STEN-CEN has the characteristics of  
63 an excitable system, including exhibiting an activation threshold for wave initiation and  
64 experiencing refractory periods. It has been shown that the STEN-CEN wave properties dictate  
65 protrusion properties (Miao et al., 2019). Tuning the activity levels of key components in STEN-  
66 CEN changes wave patterns, which leads to the transition of protrusion profiles. An  
67 activator/inhibitor, reaction/diffusion system model successfully recapitulates the experimental

68 results (Bhattacharya et al., 2020; Bhattacharya & Iglesias, 2018). For simplicity, here we will  
69 refer to STEN-CEN waves as cortical waves.

70  
71 One challenge in investigating whether cortical waves can act as the mediators of EFs is that in  
72 many of the cell types that show a strong response to EFs, the wave area is comparable to the cell  
73 area. Furthermore, waves are generated at the leading edge of the cell during directed migration  
74 (Xu et al., 2003), so that wave dynamics are tightly coupled with cell dynamics. For instance,  
75 when a cell responds to an EF reversal, waves typically remain at the cell front as the cell turns.  
76 It is not known whether the waves drive cells to turn or the cell polarity keeps the previous  
77 leading edge more active so that this edge responds first.

78  
79 To distinguish between wave response and cell motion, we produced electro-fused giant *D.*  
80 *discoideum* (Neumann et al., 1980) with diameters up to ten times larger than that of an  
81 individual cell. Multiple simultaneous waves can be generated across the surface contact area of  
82 a giant cell (Gerhardt et al., 2014). These waves also generate actin-filled macropinosomes on  
83 the dorsal membrane (Veltman et al., 2016). The giant cells provide an excellent opportunity to  
84 study cortical wave dynamics in multiple cell regions simultaneously.

85  
86 We further use nanotopography to alter the waves' spatial structures and characteristic timescales.  
87 Upon contact with nanotopography, cells produce quasi-1D wave patches. The phenomenon of  
88 guided actin polymerization by nanotopography is known as esotaxis (Driscoll et al., 2014),  
89 which has been investigated in detail (Ketchum et al., 2018; Lee et al., 2020). There are several  
90 advantages of incorporating nanotopography in our study. First, these waves persist for a shorter

91 time on nanotopography than on flat surfaces, enabling us to investigate whether wave systems  
92 with different characteristic timescales respond to EFs differently. Second, waves on ridged  
93 surfaces have shorter lifetimes than those on flat surfaces, and thus only propagate in local  
94 regions of giant cells. Therefore, nanotopography allows us to distinguish between local and  
95 global mediation of the EF response.

96

## 97 **Results**

### 98 **Cortical waves and cell migration can be studied independently in giant cells**

99 We imaged cells that simultaneously expressed both limE-RFP and PH<sub>Crac</sub>-GFP. The former  
100 allows us to monitor filamentous actin (F-actin), which represents CEN activities. The latter  
101 enables us to monitor phosphatidylinositol-3,4,5-trisphosphate (PIP3), an indicator of STEN  
102 activities. In single, differentiated cells, usually only one wave is generated at the leading edge  
103 (Fig. 1a and Video 1), and the wave motion is coupled with cell motion. For instance, when the  
104 cell in Fig. 1a changed its direction of motion, the wave remained at the leading edge (72 s - 120  
105 s).

106

107 In giant cells, multiple waves were initiated randomly and propagated radially across the basal  
108 membranes (Fig. 1b and Video 2). CEN is driven by STEN, but has a substantially shorter  
109 characteristic timescale. Thus, PIP3 waves displayed band-like shapes, whereas F-actin appeared  
110 across the bands with higher levels at the rims of PIP3 waves (Miao et al., 2019). As shown in  
111 Fig. 1b, colliding waves did not cross, but instead rotated by 90° (Fig. 1b, 150 s - 200 s). This  
112 behavior is suggestive of a refractory period following excitation, which is a hallmark of an  
113 excitable system. On nanoridges, the giant cells generated multiple, quasi-1D patches of F-actin

114 and PIP3 with shorter lifetimes than on flat surfaces (Fig. 1c and Video 3). Some waves formed  
115 and propagated for a short distance (Line 2 in Fig. 1c), whereas others formed and then quickly  
116 dissipated (Line 3 in Fig. 1c). The wave dissipation can be explained in terms of an excitable  
117 system with lateral inhibition, in which the dispersion of the inhibitor is faster than that of the  
118 activator. Thus, the waves eventually dissipate due to the spatial accumulation of the inhibitor.  
119 Prior studies have shown that in this situation, the excitable system threshold determines the  
120 wave duration (Bhattacharya et al., 2020; Ermentrout et al., 1984). As was the case on flat  
121 surfaces, 1D patches occurred throughout the basal surfaces on ridges, and thus were  
122 independent of cell motion.

123  
124 Waves were also generated on the dorsal planes. In contrast to basal waves, which propagated  
125 across the surface contact (Video 2 and Video 3), dorsal waves were associated with membrane  
126 deformations, and resembled macropinosomes (Video 4). Based on 3D lattice light-sheet images  
127 of a cell plated on nanoridges (Fig. 1d and Video 5), activation of PIP3 and F-actin was  
128 correlated in both basal waves and dorsal waves. However, the dorsal waves were primarily  
129 generated in cuplike structures, whereas the stripe-like basal waves spanned the entire basal  
130 plane. In all cases, PIP3 activity was coordinated with F-actin activity (Profiles in Fig. 1a, 1b,  
131 and 1c), both in the absence (Fig. 1) and presence of an EF (Fig. 1 – figure supplement 1, Video  
132 6). Therefore, in the experiments described below, we only monitored F-actin activity.

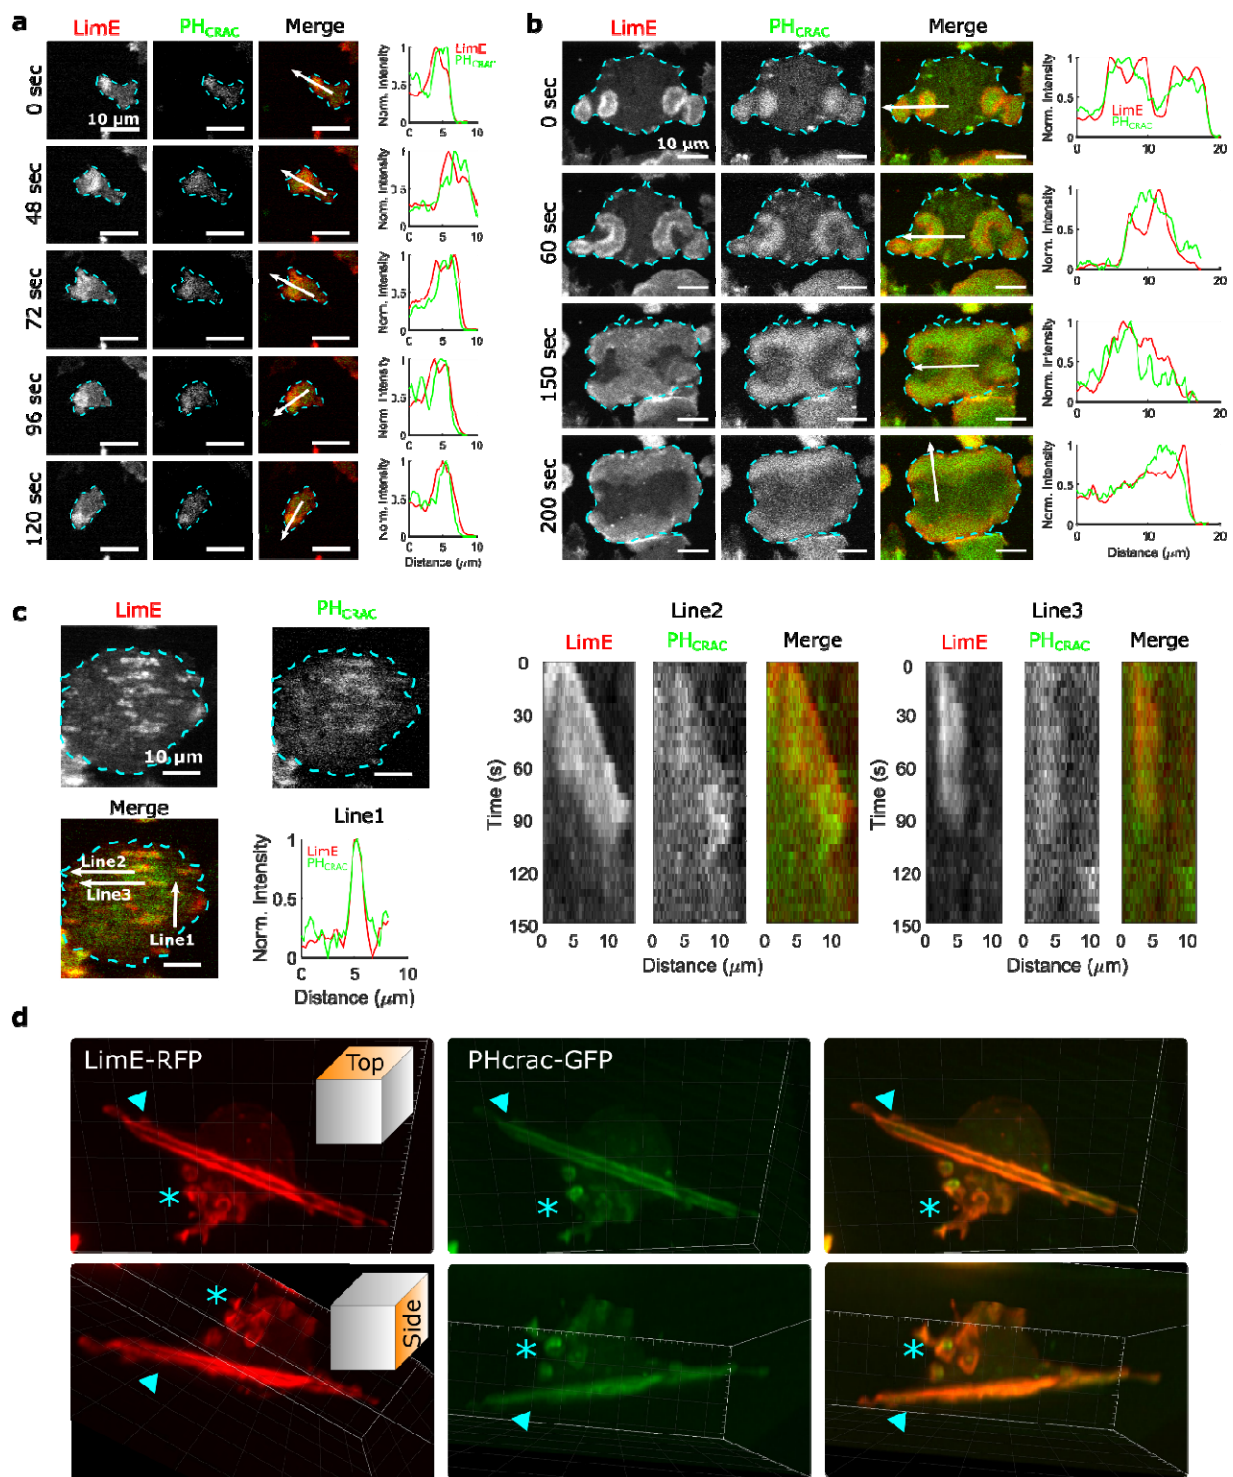

133

134 **Fig. 1. STEN-CEN waves in single cells and giant cells. a.** Snapshots of a differentiated, single

135 *D. discoideum* cell expressing limE-RFP and PHcrac-GFP, with cell boundaries denoted with

136 blue dashed lines. The right column shows the normalized intensity of limE and PHcrac from the

137 arrows in the merge images. The scale bars are 10  $\mu\text{m}$ . **b.** Snapshots of an electrofused giant *D.*  
138 *discoideum* cell on a flat surface, with scanning profiles in the right column. All scale bars are 10  
139  $\mu\text{m}$ . **c.** A snapshot of an electrofused giant cell on the ridged surface. The left kymographs are  
140 from the line 2 and line 3 specified in the merged image. Line 2 shows a wave propagating along  
141 nanoridges, and line 3 shows a wave that existed briefly and then dissipated. **d.** 3D  
142 reconstruction (single time point) of a single *D. discoideum* cell plated on nanoridges, acquired  
143 using a lattice light-sheet microscope. Here we show the top aspect view (top row) and the side  
144 aspect view (bottom row). On the dorsal membrane of the cell, there are waves forming  
145 microcytotic cups (triangle) on the curved membrane, and on the basal membrane, there are  
146 streak-like waves (asterisk). The red channel represents limE-RFP, and the green channel  
147 represents PHcrac-GFP. As both the side and top views show, the dorsal waves and basal waves  
148 are independent structures, but both are composed of coordinated F-actin and PIP3.

149

### 150 **EFs increase the area, duration, and speed of waves on nanoridges.**

151 We found that giant cells respond to a narrow range (15 V/cm to 20 V/cm) of EF amplitudes  
152 (Video 7 and Video 8), and that higher voltage (35 V/cm) damaged cells. The 1D waves  
153 generated on nanoridges related to esotaxis enabled us to quantify the effects of a 20 V/cm EF  
154 (all EFs used here are of this magnitude, see Fig. 2 – figure supplement 1 and Methods for more  
155 details about the electrotaxis experiments) on the areas, durations, and speeds of waves. Fig. 2a  
156 shows snapshots of the dynamics of F-actin in a giant cell on parallel nanoridges with a 1.6  $\mu\text{m}$   
157 spacing. In the absence of an EF (top row in Fig. 2a), individual actin polymerization events  
158 were initiated in patches on the basal surfaces (Fig. 2a and Video 9).

159



160 In the first several minutes after turning on the EF, most patches propagated as a wave along a  
161 single ridge (Fig. 2a, blue inset). After the EF was on for 10 min, some patches appeared to  
162 undergo coordinated motion across several ridges (Fig. 2a, pink inset). We calculated the ratio of  
163 F-actin occupancy to cell area, and found that an EF increased the overall level of actin  
164 polymerization by a factor of two to three (Fig. 2b). Actin patches were larger in the presence of  
165 an EF and organized into larger groups located preferentially at the cell front (bottom row in Fig.  
166 2a, 20 min, and 25 min), leading to wider protrusions at cell fronts that drove directed cell  
167 migration (Fig. 2 – figure supplement 2). To determine whether the groups comprised a single,  
168 large wave growing across multiple ridges or multiple, small patches nucleated in close  
169 proximity, we measured the dynamics of the patches using optical flow (Lee et al., 2020),  
170 focusing on the patch edges (Fig. 2c, left image. See Methods for more details). If both edges of  
171 a patch were moving in the same direction, the structure was classified as a single, large wave. If  
172 the edges were not coordinated, the patch was classified as multiple, individual structures. This  
173 method enabled us to capture accurately waves that span across multiple ridges and are moving  
174 coordinately.

175  
176 Once the large actin structures were classified, their instantaneous dimensions were measured  
177 parallel and perpendicular to the ridges (Fig. 2c). Density scatter plots of both dimensions exhibit  
178 elliptical contours (Fig. 2d), suggesting that nanotopography constrains wave growth. With an EF  
179 parallel to the ridges, the waves broadened in both directions (Fig. 2d). The average increases in  
180 wave dimension parallel and perpendicular to the ridges were 20% and 13%, respectively, and  
181 the average increase in wave area was 44%. An increase in wave duration was also observed,  
182 with the minimum wave area correlated to the duration (Fig 2e, black circles). The wave area

183 depends exponentially on the maximum wave duration (Fig. 2e, solid black lines), allowing us to  
184 extract a characteristic wave time scale via

185

$$186 \quad Area_{min} = C * e^{\frac{Duration}{T}} . \quad (1)$$

187

188 Here  $C$  is a constant, and  $T$  is the characteristic time scale, which is 48 s with no EF and 61 s in  
189 the presence of a 20 V/cm EF. This difference is consistent with the EF drawing the system  
190 closer to the excitability threshold. An average increase of 9% in wave propagation speed was  
191 also observed in the presence of an EF (Fig. 2f).

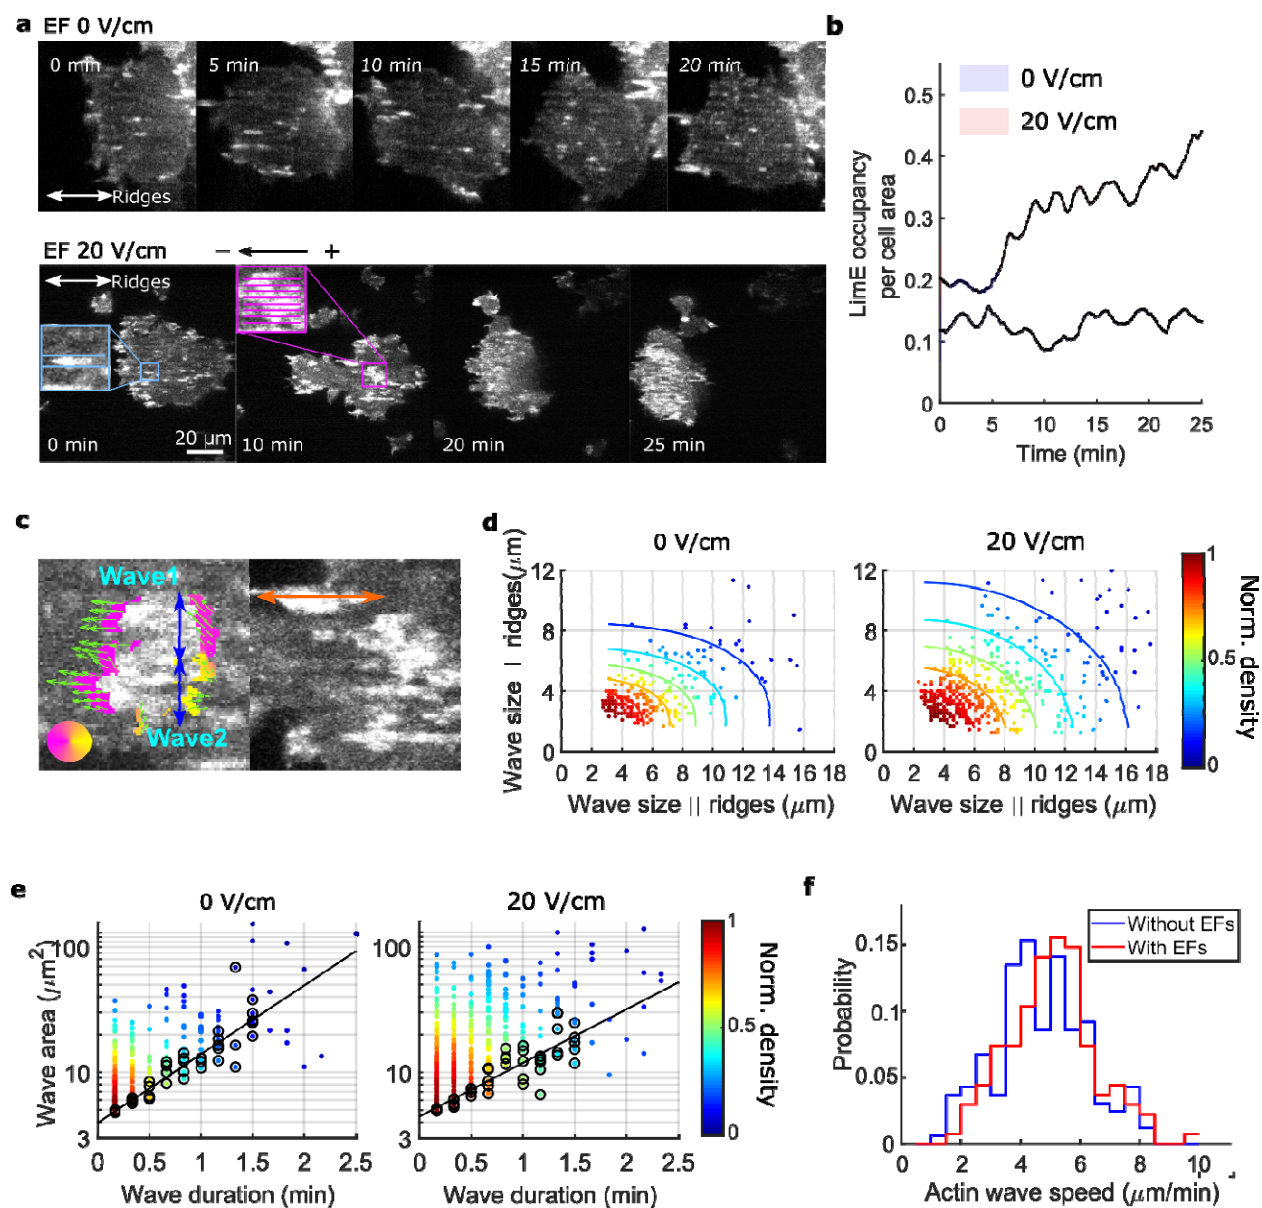

192

193 **Fig. 2. EFs alter F-actin wave properties. a.** limE images of a giant cell on nanoridges without

194 an EF (top) and in a 20 V/cm EF turned on at 0 min (bottom). **b.** The temporal change of the

195 percentage of the cell area occupied by limE without an EF (blue,  $N_{cell} = 5$ ) and in a 20 V/cm EF

196 introduced at 0 min (red,  $N_{cell} = 4$ ). The shaded areas represent the mean plus or minus one

197 standard deviation **c.** Division of groups of waves. The color represents the orientation of

198 optical-flow vectors according to the color wheel. The green arrows are the optical-flow vectors,

199 the length of which correspond to the magnitude of motion. The left image is an example of a  
200 large structure composed of two independent substructures, where the vectors at the right edge  
201 are not moving in the same direction. The wave scales in the directions perpendicular to (blue  
202 arrows) and parallel to the ridges (orange arrow) were measured on the preprocessed waves. **d.**  
203 Density scatter plots of wave scales parallel to ridges vs. perpendicular to ridges. **e.** Density  
204 scatter plots of actin-wave dimension vs. actin-wave duration. For each wave duration, the 5  
205 points with the smallest wave areas (black circles) were selected to fit the boundaries (solid black  
206 lines). **f.** Distributions of wave propagation speeds before (blue,  $N_{wave} = 125$ ) and after (red,  $N_{wave}$   
207  $= 163$ ) applying an EF. The analyses in d-f were based on  $N = 4$  independent experiments. The  
208 two distributions are different (Two-sample t-test,  $P = 0.017$ ).

209 Figure 2 – source data 1. Related to Fig. 2b

210 Figure 2 – source data 2. Related to Fig. 2d

211 Figure 2 – source data 3. Related to Fig. 2e

212 Figure 2 – source data 4. Related to Fig. 2f

213

#### 214 **EFs guide the direction of actin waves.**

215 Next, we consider the directional guidance of actin waves by EFs on nanoridges (Fig. 3a and  
216 Video 9) and on flat surfaces (Fig. 3b and Video 10, see Methods for details). The EF was  
217 introduced at 0 min ( $T_1$ ), and in the first 2 min had little effect on the actin dynamics on any  
218 surface. On nanoridges, actin waves continued to propagate preferentially along the ridges (Fig.  
219 3a,  $T_1$ ). On flat surfaces, the waves propagated radially in groups, as seen from the broad  
220 distribution at  $T_1$  in Fig. 3b. In the presence of an EF, the waves propagated preferentially

221 towards the cathode within ~15 min (Fig. 3a, 3b,  $T_2$ ). The perpendicular spread was significantly  
222 more limited on nanoridges (Fig. 3a,  $T_2$ ).

223

224 The direction of the EF was reversed after the cell had commenced steady directional migration,  
225 which took ~20 to 25 min. Following the field reversal, waves on ridged surfaces reoriented  
226 toward the new cathode within 5 min (Fig. 3a,  $T_3$ ). On flat surfaces, the wave propagation  
227 direction was perpendicular to both the previous and the new EF directions at ~7 min after the  
228 field reversal (Fig. 3b,  $T_3$ ). Preferential propagation towards the new cathode occurred after ~13  
229 min (Fig. 3b,  $T_4$ ). The difference in response time between nanoridges and flat surfaces may be  
230 related to the fact that waves persist longer on flat surfaces than on nanoridges (Fig. 3c).

231

232 Fig. 3d shows the continuous temporal changes of the orientation distributions. On nanoridges,  
233 the preferred wave directions switched directly following EF reversal (left plot in Fig. 3d),  
234 whereas on flat surfaces waves maintained a preferred direction that changed continuously in a  
235 U-turn behavior (Right plot in Fig. 3d). In contrast, although single *D. discoideum* cells undergo  
236 U-turns in response to EF reversal (Sato et al., 2007), giant cells did not (Video 10).

237 Wave turning may be related to differences in the patterns of wave expansion (Fig. 3e). On flat  
238 surfaces, waves started from a small patch (Fig. 3e, S1) and eventually broke into band-shaped  
239 waves (Fig. 3e, S4). During directed migration, the intermediate expansion of actin waves (Fig.  
240 3e, S2, S3 in the top row) was biased by the EF, resulting in band-shaped waves propagating  
241 preferentially towards the cathode (Fig. 3e, S4 in top row). After EF reversal, waves expanded in  
242 all directions (Fig. 3e, S2, S3 in bottom row), such that optical-flow analysis captured turning  
243 behavior more frequently.

244

245 We also simultaneously imaged limE-RFP at the basal plane (near the surface contact) and the  
246 dorsal plane (6  $\mu\text{m}$  higher). Dorsal waves (Video 11 and 12) are localized at cell fronts and  
247 rearranged to the new fronts following EF reversal (Fig. 3 – figure supplement 1). Rather than  
248 directly switching preferential direction, dorsal waves gradually turned toward the new cathode  
249 (Fig. 3 – figure supplement 1), in a manner similar to that of basal waves on flat surfaces. Thus,  
250 two different response times to EF reversal exist within the same cell, with a faster response for  
251 basal waves guided by nanotopography and a slower response for the free dorsal waves. On flat  
252 surfaces, the two responses are synchronized (Fig. 3 – figure supplement 2).

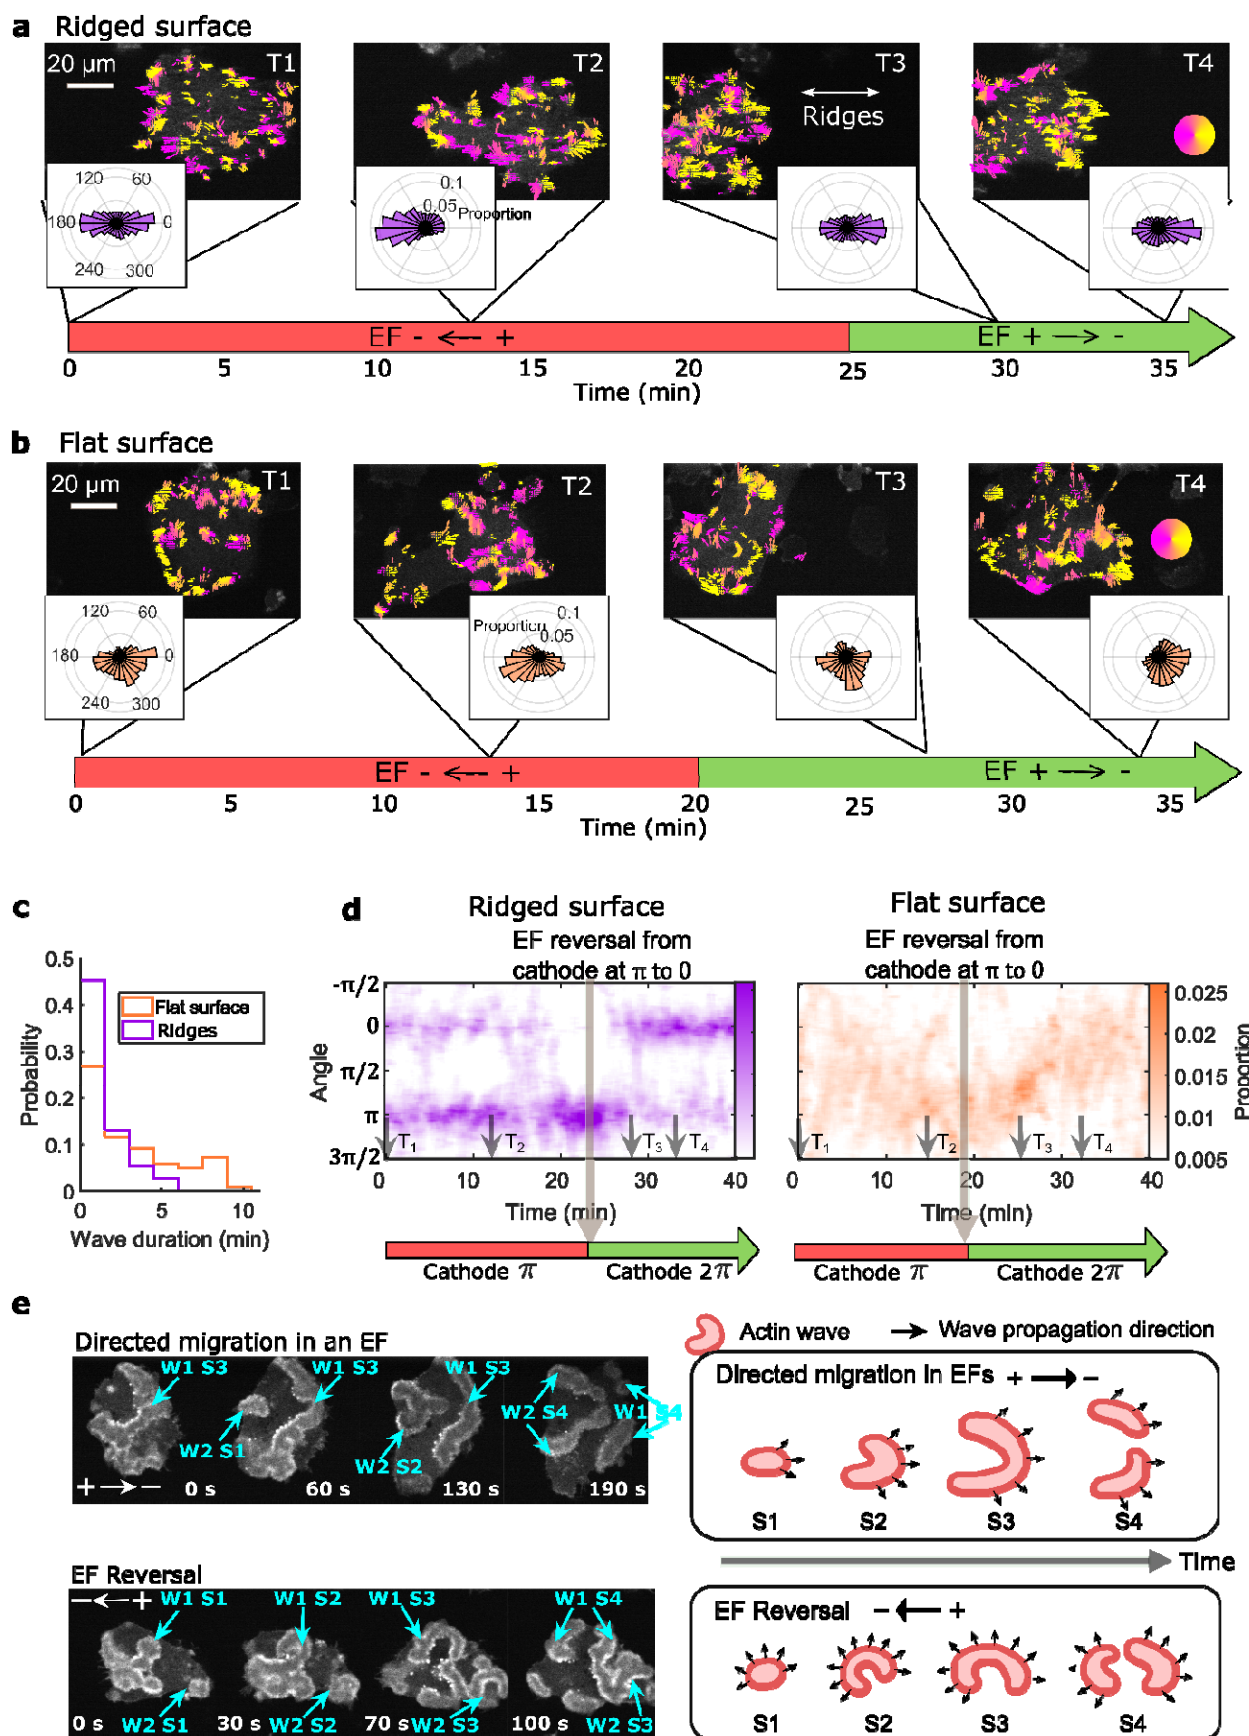

254 **Fig. 3. EFs guide actin waves. a, b** Optical-flow analysis of actin-wave dynamics in giant cells  
255 on ridged and flat surfaces. The top row shows a time series of limE images for giant cells  
256 overlaid with optical-flow vectors, the color of which is coded according to the color wheel. The  
257 accompanying polar plots show the corresponding orientation displacements of optical-flow  
258 vectors. For both a and b the EF was turned on at 0 min. The bottom time stamp indicates when  
259 the EF was reversed from the cathode being on the right (red) to the cathode being on the left  
260 (green). **c.** Distributions of wave duration from 3 independent days of experiments. The  
261 distributions were weighted by wave area, because the number of long-lasting large waves on  
262 flat surfaces ( $N_{wave} = 359$ ) is smaller than the number of short-lived small patches on ridged  
263 surfaces ( $N_{wave} = 658$ ). Correspondingly, the absolute waves counts do not match the pixel-based,  
264 optical-flow analysis in a and b. Based on a two-sample t-test on the wave areas on flat surfaces  
265 vs. on ridges, the null hypothesis was rejected at the 5% significance level with  $p = 2 \times 10^{-15}$ . **d.**  
266 Kymographs of orientation displacements of optical-flow vectors. The  $x$ -axes of the kymographs  
267 represent time, and the  $y$ -axes represent orientation. The colors represent the proportions. The EF  
268 was turned on at time  $T_1$ , and was reversed at the time denoted by the black arrow **e.** LimE  
269 snapshots showing the patterns of actin-wave expansion during steady directed migration in a  
270 constant EF (top) and after reversing the EF direction (bottom). The blue arrows point to specific  
271 stages of wave expansion. W: Wave, S: Stage of wave expansion. The right panel is a cartoon  
272 illustrating the patterns of actin-wave expansion during directed migration in EFs (top) and after  
273 EFs were reversed (bottom).

274 Figure 3 – source data 1. Related to Fig. 3c

275

276



277 **Subcellular spatial inhomogeneity of the response to EFs on nanoridges.**

278 Although waves in migrating *D. discoideum* cells localize predominantly at the leading edge  
279 (Weiner et al., 2007; Zhao et al., 2002), waves are observed across the basal layer in giant *D.*  
280 *discoideum* cells. We analyzed the smaller, shorter-lived waves on nanoridges. Although the  
281 wave locations were distributed essentially uniformly throughout cells in the absence of an EF,  
282 more waves were generated at the cell fronts in the presence of an EF (Fig. 4a and Video 9). In  
283 addition, the average area per wave was larger near the front of cells in an EF (Fig. 4b). We also  
284 measured the wave properties in the single cells scattered throughout the field of view but did not  
285 observe a corresponding gradient of wave properties among single cells closer to the cathode  
286 versus the cells closer to the anode. This result indicates that the spatial inhomogeneity shown in  
287 Figs. 4a, b was caused by the EF rather than by the absolute electrical potential relative to the  
288 ground (Fig. 4 – figure supplement 1).

289  
290 We explored the response of this inhomogeneity to EF reversal by tracking each wave location  
291 relative to the cell centroid in the 12 min following EF reversal (Fig. 4c). New waves started to  
292 appear near the side of the cell facing the new cathode within 3 min (Fig. 4c, left region of  $P_2$ ),  
293 whereas the complete inhibition of wave generation near the old cell front took longer (Fig. 4c,  
294 right region of  $P_5$ ). This observation suggests that the initiation at a new cell front and the  
295 inhibition of waves at the old front are regulated by two distinct processes with different  
296 timescales.

297  
298 Next, we looked at the time required to switch propagation direction in different subcellular  
299 regions following EF reversal. The basal membrane was segmented into an “old front” region

300 (facing the original cathode) and a “new front” region (facing the new cathode), as illustrated in  
301 Fig. 4d. The distributions of wave propagation directions show that waves in the new front  
302 region switched their preferential direction at ~4 min. In contrast, waves in the old front region  
303 changed their preferential direction on a time scale of ~ 7 min (Figs. 4 e, f). Our analysis further  
304 shows that larger waves in the old fronts are less sensitive to EF reversal than those in the new  
305 fronts (Fig. 4 – figure supplement 2).

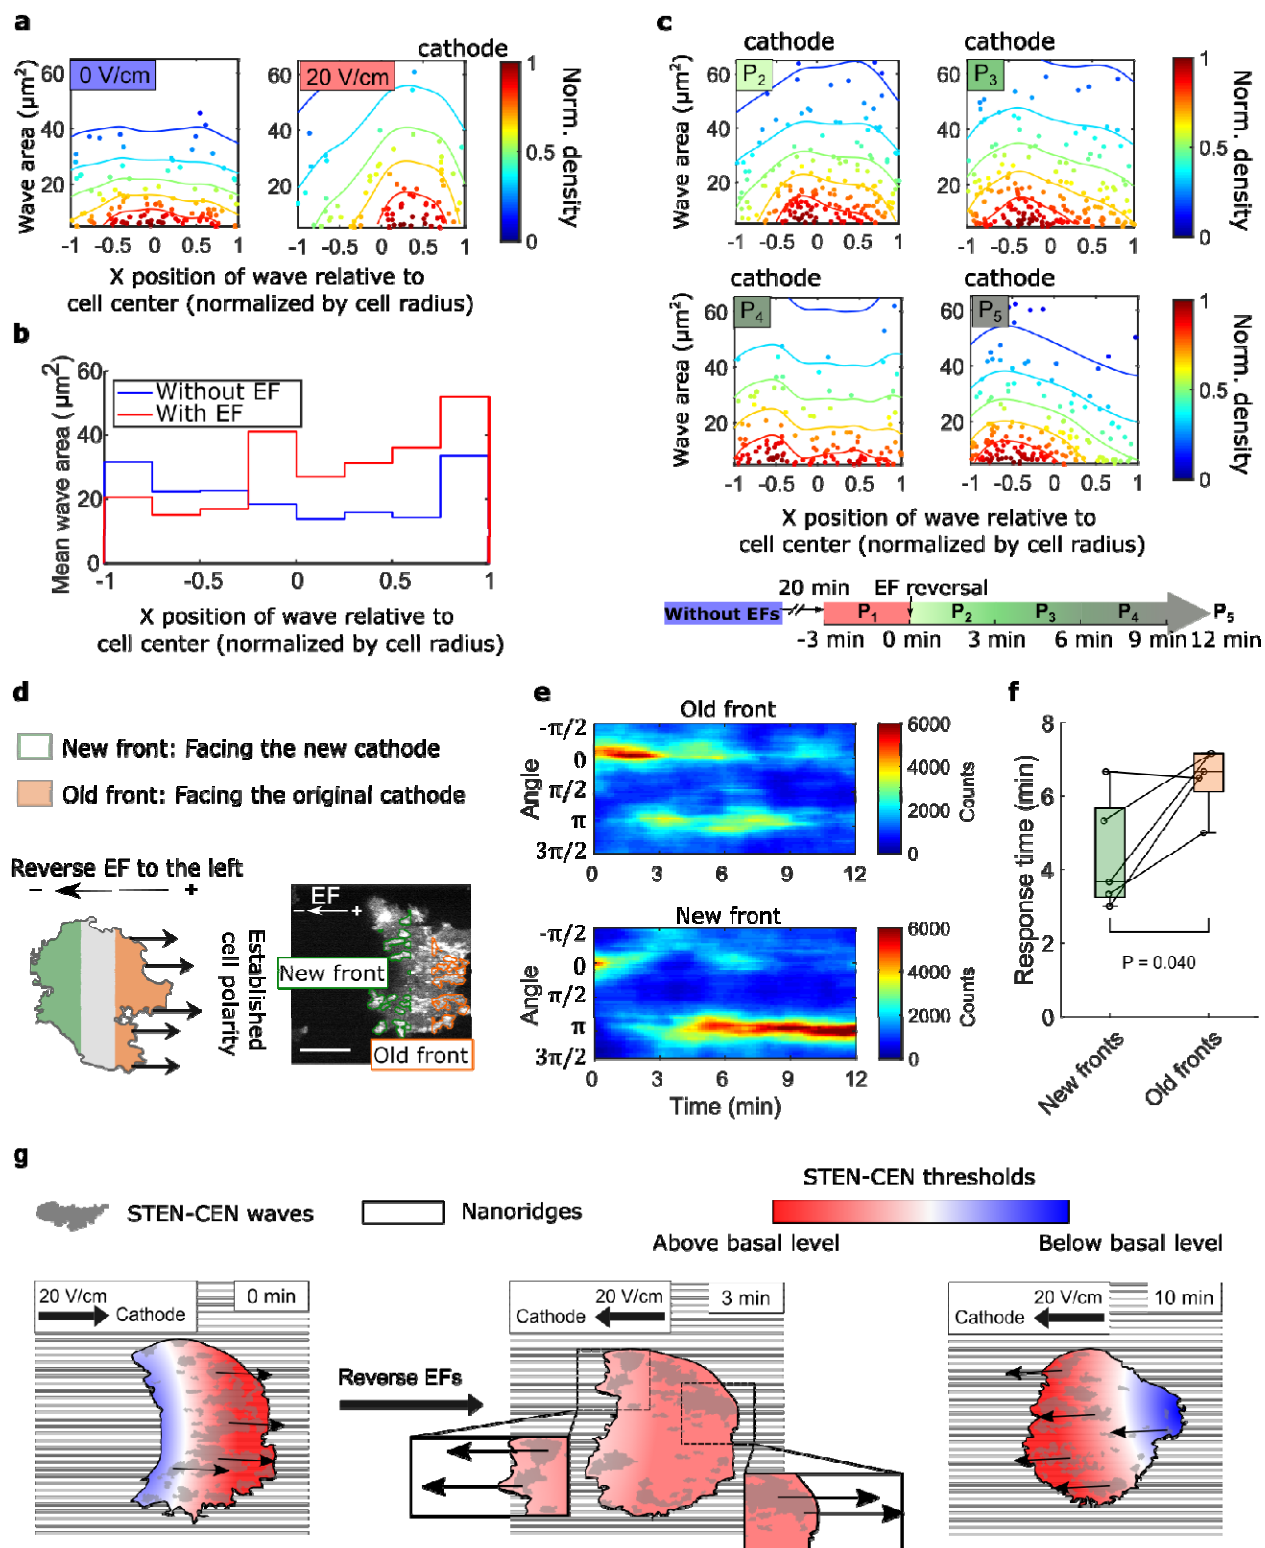

306 **Fig. 4. Spatial inhomogeneity of the response to EFs on nanoridges.** a. Density scatter plots  
 307 of the wave area vs. x position of the wave relative to the cell center. Nanoridges and EF are

308 orientated in the x-direction. The difference of x coordinates of cell center and wave location was  
309 calculated, then the value was further normalized by the cell radius. Each point represents a wave,  
310 and all the points were collected from 5 independent experiments. The left plot is for a period in  
311 which there was no EF ( $N_{wave} = 296$ ), and the right plot is for a period in which there was a 20  
312 V/cm EF, during which the cells exhibited steady directional migration ( $N_{wave} = 224$ ). For each  
313 experiment without an EF, the EF was always turned on several minutes later. Thus, we defined  
314 the direction in which cathode was located in the presence of an EF as the positive direction in  
315 the absence of an EF. The color code corresponds to the density of points. **b.** Average wave area  
316 in sub-cellular regions. The points in a were sectioned, based on their x position relative to the  
317 cell center (normalized by cell radius) at a bin size of 0.25 (8 sections in total from -1 to 1), and  
318 calculated the average wave area in each section. **c.** Changes in actin waves' spatial distribution  
319 in response to EF reversal; data from 6 independent experiments. The color of each plot is coded  
320 according to the timeline displayed at the bottom of the panel.  $P_2$ - $P_5$ : The EF was reversed, and  
321 cells gradually developed polarization towards the new cathode. The number of waves in each  
322 plot:  $N_{p2} = 272$ ,  $N_{p3} = 277$ ,  $N_{p4} = 193$ ,  $N_{p5} = 246$ . **d.** A schematic illustrating the old and new  
323 fronts of giant cells when the EF was reversed. **e.** Time stacks of orientation distributions of  
324 optical-flow vectors at an old front and a new front. The EF was reversed from the cathode being  
325 at the right (0) to the cathode being at the left ( $\pi$ ) at 0 min. **f.** Comparisons of response time  
326 between new fronts (green) and old fronts (orange) from multiple experiments ( $N_{cell} = 5$ ). The  $P$ -  
327 value was calculated using a pairwise t-test at the 5% significance level. **g.** Cartoon illustrating  
328 different time scales of local wave propagation and global rearrangement of STEN-CEN  
329 thresholds, in response to EF reversal.

330 Figure 4 – source data 1. Related to Fig. 4a-c

## 331 **Discussion**

332 By employing giant cells, in which the cortical waves are disentangled from cell motion, we  
333 demonstrate that EFs modulate cortical wave dynamics directly, providing a mechanism for cell  
334 guidance by EFs (Fig. 1 c, b, d). Our use of nanoridges to generate quasi-1D waves that are small,  
335 short-lived, and unable to turn (Fig. 1c) enabled detailed quantification of wave properties,  
336 demonstrating that EFs directly affect the abundance, locations, and directions of cortical waves.

337

### 338 **EFs guide cortical wave dynamics**

339 Previous studies have suggested that the basal cortical waves in *D. discoideum* are insensitive to  
340 external chemotactic gradients, whereas “pseudopods” at other regions in the same cells can be  
341 guided (Lange et al., 2016). This conclusion is surprising because the biochemical events  
342 traveling with the waves are the same as those occurring on pseudopods, and pseudopods with  
343 the dorsal cups on the same cells do respond to chemoattractants. Also, similar cortical waves in  
344 human mammary epithelial cells can be guided effectively by epidermal growth factors (Zhan et  
345 al., 2020). Additional input from the greater contact of giant *D. discoideum* cells with the  
346 surface may outweigh the effect of applied chemical gradients on the basal waves. Other studies  
347 have shown that single cells can integrate combinations of external chemical and mechanical  
348 stimuli.

349

350 Our work shows that in giant cells, waves of both F-actin polymerization (Fig. 3) and its  
351 upstream regulator PIP3 (Fig. 1 – figure supplement 1) are indeed guided by EFs. These biased  
352 biochemical and biomechanical events lead to more protrusions at the cell front than at the cell  
353 back, thus driving cell migration (Fig. 2 – figure supplement 2). The development of the biased

354 wave activities takes ~10 min following the introduction of an EF (Fig. 2a and Fig. 3), which is  
355 much slower than the timescale of surface-receptor-regulated chemotaxis. The high resistance of  
356 the cell membrane limits the effects of EFs on intracellular components, but EFs may act on the  
357 charged lipids and molecular clusters. Thus, we suspect that the slow response results from the  
358 electrophoresis of the charged membrane components involved in wave formation, which has a  
359 characteristic time scale of 5 to 10 min (Allen et al., 2013; McLaughlin & Poo, 1981).

360  
361 We further explored the dynamics in response to EF reversal at the subcellular level using  
362 nanotopography (Fig 4). We observed that the new waves are induced to propagate towards the  
363 current cathode within 2 to 3 min (Fig. 4e and Fig.4 – figure supplement 2), suggesting that  
364 waves themselves can adapt quickly to the changing electrical environments. Because we only  
365 observed the fast adaptation on ridged surfaces, this phenomenon may be related to the shorter  
366 wave lifetimes on nanoridges than on flat surfaces. A short lifetime allows waves to be nucleated  
367 at a higher rate on the nanoridges, leading to a rapid directional response. During this process,  
368 the EF may regulate the wave nucleation through locally changing specific charged lipids, ion  
369 fluxes, or local pH gradients (Crevenna et al., 2013; Frantz et al., 2008; Köhler et al., 2012;  
370 Martin et al., 2011; Zhou & Pang, 2018).

371

### 372 **EFs modulate the thresholds of the excitable wave system**

373 Recent studies have shown that the cortical wave system can be described as a coupled signal  
374 transduction and cytoskeletal excitable network. Based on both simulation and experimental  
375 studies (Bhattacharya et al., 2020; Miao et al., 2017), it has been shown that the wave ranges,

376 durations, and speeds are determined by the local threshold of activation, which in turn are  
377 regulated by the relative levels of activators and inhibitors (Miao et al., 2017, 2019).

378  
379 Our quantification shows that guided waves become larger, faster, and more persistent in an EF  
380 (Fig. 2), indicating that the excitable system is closer to its threshold for activation (Miao et al.,  
381 2019). This effect may arise from enhanced positive feedback, reduced negative feedback, or  
382 both. We further find that wave nucleation is enhanced at the cell front and suppressed at the  
383 back (Fig. 4a, b). This subcellular inhomogeneity is consistent with a biased excitable network  
384 framework (Iglesias & Devreotes, 2012; Meinhardt, 1999; Tang et al., 2014; Xiong et al., 2010),  
385 which was added to the STEN-CEN model to introduce an internal spatial gradient in the local  
386 threshold of wave initiation, akin to cell polarity.

387  
388 Local excitation and global inhibition (Xiong et al., 2010), LEGI, schemes have effectively  
389 recreated the features of both fast directional sensing and stable polarity in response to chemical  
390 signals, which can lead to robust biased excitable network. Both directional sensing and stable  
391 polarity can lead to a robust biased excitable network. For chemical signals, the directional  
392 response from PIP3 occurs within seconds, whereas the establishment of stable polarity usually  
393 requires many minutes. However, based on our analysis, establishing both directional response  
394 (Fig. 3) and polarity (Fig. 4) in response to EFs requires 5 to 10 min. It is worth noting that PIP3  
395 waves also sense EFs on a time scale of minutes (Fig. 1 – figure supplement 1). Our observation  
396 suggests that EFs act on the polarity establishment rather than directional sensing. This  
397 hypothesis is supported by a recent study showing that G-protein-coupled receptors (GPCRs),

398 which are the regulator in the LEGI model for *D. discoideum* that allows for sensing  
399 chemoattractant on timescales of seconds, are not essential for electrotaxis (Zhao et al., 2002).

400

#### 401 **EFs act on waves, and waves determine cell behaviors**

402 Our results raise the possibility that cortical wave dynamics are modulated directly by EFs and  
403 that the waves in turn mediate cellular response. Waves travel across cell membranes to  
404 coordinate the trailing edge with the front edge, and the cytoskeletal components in cortical  
405 waves are involved in developing the stable polarity. On the other hand, the duration and turning  
406 capacity of STEN-CEN waves directly impact the speed and characteristics of the cellular  
407 response to EFs (Fig. 3) on a longer timescale than that of surface-receptor-regulated chemotaxis.

408

409 Our results shed light on how EFs modulate protrusions. Previous studies have shown that  
410 various protrusions that drive cell motion, such as filopodia, lamellipodia (Miao et al., 2019), and  
411 macropinocytotic cups (Video 4), are always associated with expanding waves near cell  
412 perimeter. Our previous work has shown that changing wave properties by perturbing STEN-  
413 CEN states leads to the transition of protrusion profiles, which indicates that wave properties  
414 dictate the properties of the protrusions (Miao et al., 2019). Here we showed that EFs can alter  
415 the waves differently on the two ends of the cell (Fig. 4a). As a result of these spatially  
416 inhomogeneous wave properties, protrusions become more abundant and larger on one side of  
417 the cell versus the other, which eventually leads to guidance of cell migration.

418

419 On flat surfaces, a slow U-turn is observed following EF reversal, whereas on nanoridges, faster  
420 switching is observed. Thus, the response of migrating cells to a changing guidance cue can be



421 predicted from the characteristics of the waves driving the migration process. Indeed, the U-turn  
422 behaviors of neutrophils and differentiated, single *D. discoideum* cells in response to EF reversal  
423 (Hind et al., 2016; Sato et al., 2007; Srinivasan et al., 2003; Xu et al., 2003), which are usually  
424 ascribed to stable cell polarity, may instead reflect the persistence and 2D turning behavior of  
425 cortical waves in these environments (Fig. 3).

426

427 Nanoridges allow us to shed further light on the multiscale character of the system, because cells  
428 include both short, 1D waves on the basal plane, and longer-lasting, 2D waves on the dorsal  
429 plane. The different response times on the subcellular level due to different wave behaviors (Fig.  
430 4 – figure supplement 2) provide strong evidence that cortical waves act as direct mediators of  
431 EFs. Waves on different planes are similar in composition but are impacted differently by the EF.  
432 We observed fast switching of wave directions in the basal plane near the ridged substrate and  
433 slower turning of the waves in the dorsal plane within the same cell, indicating that the direction  
434 of waves is controlled locally by external cues (Fig. 3 – figure supplement 1).

435

436 EFs provide a means to modulate cortical waves directly. On the other hand, biological  
437 conditions that modulate wave characteristics may also speed up or suppress the cellular  
438 response to directional cues. Longer-lasting waves offer persistence in the face of rapidly  
439 changing gradients, whereas shorter waves yield faster adaptability to changing directional  
440 signals. The durations of waves and their ability to turn together have a dominant effect on the  
441 response of cells to an EF.

|                            |
|----------------------------|
| <b>Key Resources Table</b> |
|----------------------------|

| <b>Reagent type<br/>(species) or<br/>resource</b> | <b>Designation</b>                          | <b>Source or<br/>reference</b>                                                                            | <b>Identifiers</b> | <b>Additional<br/>information</b>                     |
|---------------------------------------------------|---------------------------------------------|-----------------------------------------------------------------------------------------------------------|--------------------|-------------------------------------------------------|
| Cell line ( <i>D. discoideum</i> )                | Aca null                                    | <a href="https://doi.org/10.1016/S0092-8674(03)00081-3">https://doi.org/10.1016/S0092-8674(03)00081-3</a> |                    | The cell line was a gift from Carole A. Parent lab.   |
| Cell line ( <i>D. discoideum</i> )                | PHcrac-GFP<br>LimE-RFP                      | <a href="https://doi.org/10.1038/ncb3495">https://doi.org/10.1038/ncb3495</a>                             |                    | The cell line was a gift from Peter N. Devreotes lab. |
| software,<br>algorithm                            | Optical flow<br>analysis (run by<br>MATLAB) | <a href="https://doi.org/10.1091/mbc.E19-11-0614">https://doi.org/10.1091/mbc.E19-11-0614</a>             |                    |                                                       |

442

## 443 **Materials and Methods**

### 444 Cell line

445 In the study, we used LimE-RFP aca null *Dictyostelium discoideum* (D.d.) and PHcrac-

446 GFP/LimE-RFP D.d cell lines. LimE-RFP aca null was a gift from Carole A. Parent lab

447 ([https://doi.org/10.1016/S0092-8674\(03\)00081-3](https://doi.org/10.1016/S0092-8674(03)00081-3)), and PHcrac-GFP-LimE-RFP was a gift from

448 Peter N. Devreotes lab (<https://doi.org/10.1038/ncb3495>). We have conducted the mycoplasma  
449 contamination testing for both cell lines and did not detected contamination.

450

#### 451 Cell culture

452 *Dictyostelium discoideum* cell lines were grown axenically in the HL5 medium. Aggregation  
453 adenyl cyclase null (ACA<sup>-</sup>) mutants, which do not produce cAMP and do not have chemotaxis  
454 signal relay (Kriebel et al., 2003), were used in electrotaxis experiments to avoid chemotaxis.  
455 The cells used also express limE-RFP as a reference for filamentous actin structures. G418 was  
456 used as the selection medium during cell culture. For the experiments in Fig. 1/ Fig.1 -  
457 supplement figure 1, we used *Dictyostelium discoideum* co-expressing PHcrac-GFP and LimE-  
458 RFP, and we used G418 as the selective medium. Note that an enhancement in LimE  
459 concentration is associated with protrusions, as seen in fig. 2 -figure supplement 2, and that the  
460 protrusions are biased to the side facing the cathode. Because protrusions are driven by F-actin  
461 polymerization, we believe this observation rules out the possibility that LimE binding/unbinding  
462 to/from F-actin itself is sensitive to EFs.

463

#### 464 Electrofusion

465 Cells were washed twice with 17 mM Sorensen buffer (15 mM KH<sub>2</sub>PO<sub>4</sub> and 2 mM Na<sub>2</sub>HPO<sub>4</sub>,  
466 pH 6.0) and rolled for 30 min at a concentration of  $1.5 \times 10^7$  mL<sup>-1</sup>. Electrofusion was conducted  
467 with a Gene Pulser Gen1 system. Three pulses of 1 kV at a 1 s interval were applied. After  
468 electroporation, cells were relaxed for 5 min. Then cells were diluted to  $5 \times 10^5$  mL<sup>-1</sup> with normal  
469 developing buffer (5 mM KH<sub>2</sub>PO<sub>4</sub>, 5 mM Na<sub>2</sub>HPO<sub>4</sub>, 2 mM MgCl<sub>2</sub> and 0.2 mM CaCl<sub>2</sub>, PH 6.5)  
470 and seeded into a customized electrotactic chamber, with dimensions 20 mm × 5 mm × 0.25 mm.

471 The aca null cell line that we used did not generate many waves in the vegetative stage, and  
472 electro-fusion with 1 kV pulses stressed the cells. Thus cells were starved for 2 h before  
473 experiments to generate more actin waves.

474

#### 475 Nanotopography fabrication

476 The nanotopographic pattern used in these cell studies was fabricated through a technique known  
477 as multiphoton absorption polymerization (MAP), as described elsewhere (C. M. LaFratta et al.,  
478 2006; C. N. LaFratta et al., 2004). An ultrafast, pulsed laser beam (Coherent Mira 900-F, 76  
479 MHz) was passed through a high-numerical-aperture microscope objective onto a  
480 photopolymerizable resin, sandwiched between glass coverslips. A LabVIEW (National  
481 Instruments) program allowed for control of the stage position and the shutter state, determining  
482 where polymerization occurred (and did not) in the resin and allowing patterning. Once  
483 fabrication was completed, the patterned sample was developed in ethanol twice for 3 min each  
484 to remove unreacted monomer. The polymerized structure was baked at 110 °C for at least 1 h.

485

486 To produce the necessary number of replicate patterns with the same dimensions, an adapted  
487 version of replica molding was performed (Sun et al., 2018). A hard polydimethylsiloxane (*h*-  
488 PDMS) film containing hexanes to increase the resolution of feature replication was spin-coated  
489 onto the functionalized structure made from MAP. The film was allowed to sit on the structure  
490 for 2 h at room temperature and was then baked at 60 °C for 1 h. Regular PDMS (Sylgard 184)  
491 was prepared at a 10:1 ratio of elastomer base to the curing agent by degassing and mixing. The  
492 PDMS was poured onto the *h*-PDMS film, and molding was completed by baking at 60 °C for an

493 additional 70 min. The final mold was peeled from the glass slide supporting the MAP-patterned  
494 structure.

495  
496 The mold was used to produce replicas of the original pattern. A drop of the same acrylic resin  
497 was placed on the patterned area of the PDMS mold, and then an acrylate-functionalized glass  
498 coverslip was pressed firmly on top, spreading the sandwiched drop. Tape secured this system in  
499 place. The resin was cured for a total of 5 min under a UV lamp (Blak-ray), producing a polymer  
500 film. It should be noted that the PDMS mold is the negative relief pattern of the structure made  
501 using MAP. Therefore, samples (or replicas) of the original pattern could be produced on a  
502 relatively large scale with this method. The replicas were soaked in ethanol for at least 12 h  
503 before use in the cell studies. We fabricated flat surface samples by using a PDMS mold with a  
504 smooth surface.

505

#### 506 Lattice light-sheet microscopy

507 The 3i lattice light-sheet microscope in the Johns Hopkins School of Medicine Microscope  
508 Facility was used for 2-color, 3D imaging. Vegetative, single *Dictyostelium* cells were seeded on  
509 a circular 5 mm coverslip patterned with nanoridges, which was immersed in a bath of standard  
510 developing buffer throughout imaging.

511

#### 512 Electrotaxis experiments

513 We 3D-printed electrotaxis chambers (Fig. 2 – figure supplement 1) with dimensions of 20 mm ×  
514 5 mm × 0.25 mm and composed of a clear resin using a Formlabs Form2 3D-printer. Agar  
515 bridges were used to isolate cell media from electrodes to minimize electrochemical products

516 and pH changes. 20 V/cm constant EFs were applied. Time-lapse images of the phase-contrast  
517 channel and the RFP/GFP channel were recorded using PerkinElmer spinning-disk microscope at  
518 a frame rate of 0.1 frames/s (Yokogawa CSU-X1 spinning-disk scan head (5000 rpm)) with  
519 Hamamatsu EMCCD camera and Volocity analysis software.

520

### 521 Optical-flow analysis and model fitting of actin polymerization dynamics

522 We applied the Lukas-Kanade optical-flow method to quantify the direction of the intensity flow  
523 in fluorescence videos. This algorithm produced pixel-basis vector fields of intensity motion.  
524 Before applying the optical-flow algorithm, each image was smoothed by a 2D Gaussian filter ( $\sigma$   
525 = 3) to reduce noise. After the smoothing, we further removed the flow vectors created by noise  
526 using optical-flow reliability as our criterion. The reliability is defined as the smallest  
527 eigenvalues of the  $A^T w A$  matrix, where  $w$  is a Gaussian weight matrix and  $A$  is the intensity  
528 gradient matrix. The size of the weight matrix for *D. discoideum* was set at  $19 \times 19$ , with  
529 standard deviation  $\sigma = 2$  (0.42  $\mu\text{m}$ ).

530

531 We built a bimodal von Mises model to compare the actin and cellular responses accurately. A  
532 von Mises distribution is given by

$$533 \quad f_{VM}(\theta|\mu, \kappa) = \frac{e^{\kappa \cos(\theta-\mu)}}{2\pi I_0(\kappa)} \quad (2)$$

534 where the peak location is  $\mu$  and the concentration  $\kappa$ . The orientation distribution of optical-flow  
535 vectors at each time point is fit with two von Mises distributions

$$536 \quad f(\theta|\mu_1, \mu_2, \kappa, p_1, p_2) = p_1 f_{VM}(\theta|\mu_1, \kappa) + p_2 f_{VM}(\theta|\mu_1 + \pi, \kappa) \quad (3)$$

537 where  $p$  is the proportion of each component. We use the constraints

$$538 \quad \mu_1 - \mu_2 = \pi \quad (4)$$

539 and

$$540 \quad p_1 + p_2 = 1 . \quad (5)$$

541 Maximum likelihood estimation (MLE) is applied to estimate model parameters based on the  
542 orientation of all the optical-flow vectors every 12 frames (2 min). With this model, we can  
543 quantitatively study the temporal change of actin dynamics. The preferential direction is defined  
544 as the  $\mu$  with the largest proportion  $p$  at each time point.

545

#### 546 Quantification of actin wave properties

547 The segmentation of actin waves was conducted based on the combined information from  
548 fluorescence intensities and optical flow. We first applied the kmeans ( $k = 3$ ) cluster (Kanungo et  
549 al., 2002) to pick up the bright regions in the limE-RFP videos, then only kept the moving  
550 objects by applying the reliability mask from the optical-flow analysis.

551 To classify the large actin structures composed of substructures moving independently, we  
552 considered the optical flow at the edges of the large structure (Fig. 2c). If the optical-flow vectors  
553 were moving in the same direction at both edges, the large structure was classified as a single  
554 wave. Otherwise, the large structure was divided into multiple smaller patches. In the latter case,  
555 a pronounced boundary was detectable between two substructures, then we used the detected  
556 boundary to divide the large structure into multiple substructures.

557

558 After classification, we measured properties such as wave speed, wave duration, and wave area  
559 to characterize STEN-CEN. Wave speed was measured by tracking the clusters of optical-flow  
560 vectors oriented in similar directions. The detailed algorithm can be found in a prior publication  
561 (Lee et al., 2020). To measure wave duration, we first tracked actin waves using a customized,

562 multi-object tracking tool based on the overlapping areas between frames. A unique  
563 identification number was assigned to each wave, then wave duration, wave area (measured by  
564 the Matlab function `regionprops`) were recorded for each wave.

565

566 **Acknowledgments:** We thank Q. Qing and M. Zhao for the discussion. **Competing interests:**

567 The authors declare that they have no competing interests.

568

569 **References:**

570 Allen, G. M., Mogilner, A., & Theriot, J. A. (2013). Electrophoresis of cellular membrane

571 components creates the directional cue guiding keratocyte galvanotaxis. *Current Biology*,

572 23(7), 560–568. <https://doi.org/10.1016/j.cub.2013.02.047>

573 Bhattacharya, S., Banerjee, T., Miao, Y., Zhan, H., Devreotes, P. N., & Iglesias, P. A. (2020).

574 Traveling and standing waves mediate pattern formation in cellular protrusions. *Science*

575 *Advances*, 6(32), eaay7682. <https://doi.org/10.1126/sciadv.aay7682>

576 Bhattacharya, S., & Iglesias, P. A. (2018). Controlling excitable wave behaviors through the

577 tuning of three parameters. *Biological Cybernetics*, 113(1), 61–70.

578 <https://doi.org/10.1007/s00422-018-0771-0>

579 Bhattacharya, S., Miao, Y., Devreotes, P. N., & Iglesias, P. A. (2019). A Coupled Excitable

580 Network Model Dictates Cortical Wave Patterns and Controls Cellular Protrusion

581 Morphology. *Biophysical Journal*, 116(3), 121a. <https://doi.org/10.1016/j.bpj.2018.11.675>

582 Bretschneider, T., Anderson, K., Ecke, M., Müller-Taubenberger, A., Schroth-Diez, B.,

583 Ishikawa-Ankerhold, H. C., & Gerisch, G. (2009). The three-dimensional dynamics of actin

584 waves, a model of cytoskeletal self-organization. *Biophysical Journal*, 96(7), 2888–2900.



- 585 <https://doi.org/10.1016/j.bpj.2008.12.3942>
- 586 Cortese, B., Palamà, I. E., D'Amone, S., & Gigli, G. (2014). Influence of electrotaxis on cell  
587 behaviour. *Integrative Biology (United Kingdom)*, 6(9), 817–830.  
588 <https://doi.org/10.1039/c4ib00142g>
- 589 Crevenna, A. H., Naredi-Rainer, N., Schonichen, A., Dzubiella, J., Barber, D. L., Lamb, D. C., &  
590 Wedlich-Söldner, R. (2013). Electrostatics control actin filament nucleation and elongation  
591 kinetics. *Journal of Biological Chemistry*, 288(17), 12102–12113.  
592 <https://doi.org/10.1074/jbc.M113.456327>
- 593 Devreotes, P. N., Bhattacharya, S., Edwards, M., Iglesias, P. A., Lampert, T., & Miao, Y. (2017).  
594 Excitable Signal Transduction Networks in Directed Cell Migration. *Annual Review of Cell  
595 and Developmental Biology*, 33(1), annurev-cellbio-100616-060739.  
596 <https://doi.org/10.1146/annurev-cellbio-100616-060739>
- 597 Driscoll, M. K., Sun, X., Guven, C., Fourkas, J. T., & Losert, W. (2014). Cellular contact  
598 guidance through dynamic sensing of nanotopography. *ACS Nano*, 8(4), 3546–3555.  
599 <https://doi.org/10.1021/nm406637c>
- 600 Ermentrout, G. B., Hastings, S. P., & Troy, W. C. (1984). Large Amplitude Stationary Waves in  
601 an Excitable Lateral-Inhibitory Medium. *SIAM Journal on Applied Mathematics*, 44(6),  
602 1133–1149. <https://doi.org/10.1137/0144081>
- 603 Flemming, S., Font, F., Alonso, S., & Beta, C. (2020). How cortical waves drive fission of motile  
604 cells. *Proceedings of the National Academy of Sciences of the United States of America*,  
605 117(12), 6330–6338. <https://doi.org/10.1073/pnas.1912428117>
- 606 Frantz, C., Barreiro, G., Dominguez, L., Chen, X., Eddy, R., Condeelis, J., Kelly, M. J. S.,  
607 Jacobson, M. P., & Barber, D. L. (2008). Cofilin is a pH sensor for actin free barbed end

- 608 formation: role of phosphoinositide binding. *Journal of Cell Biology*, 183(5), 865–879.  
609 <https://doi.org/10.1083/jcb.200804161>
- 610 Gerhardt, M., Ecke, M., Walz, M., Stengl, A., Beta, C., & Gerisch, G. (2014). Actin and PIP3  
611 waves in giant cells reveal the inherent length scale of an excited state. *Journal of Cell*  
612 *Science*, 127(20), 4507–4517. <https://doi.org/10.1242/jcs.156000>
- 613 Gerisch, G. (2010). Self-organizing actin waves that simulate phagocytic cup structures. *PMC*  
614 *Biophysics*, 3(1), 1–9. <https://doi.org/10.1186/1757-5036-3-7>
- 615 Harvath, L., Robbins, D., Russell, A. A., & Seamon, K. B. (1991). Elevation of cAMP  
616 differentially affects chemotactic responsiveness. *The Journal of Immunology*, 146 (1)  
617 22(Vol. 146, Issue 1).
- 618 Hind, L. E., Vincent, W. J. B., & Huttenlocher, A. (2016). Leading from the Back: The Role of  
619 the Uropod in Neutrophil Polarization and Migration. *Developmental Cell*, 38(2), 161–169.  
620 <https://doi.org/10.1016/j.devcel.2016.06.031>
- 621 Iglesias, P. A., & Devreotes, P. N. (2012). Biased excitable networks: How cells direct motion in  
622 response to gradients. *Current Opinion in Cell Biology*, 24(2), 245–253.  
623 <https://doi.org/10.1016/j.ceb.2011.11.009>
- 624 Kanungo, T., Mount, D. M., Netanyahu, N. S., Piatko, C. D., Silverman, R., & Wu, A. Y. (2002).  
625 An efficient k-means clustering algorithms: Analysis and implementation. *IEEE*  
626 *Transactions on Pattern Analysis and Machine Intelligence*, 24(7), 881–892.  
627 <https://doi.org/10.1109/TPAMI.2002.1017616>
- 628 Ketchum, C. M., Sun, X., Suberi, A., Fourkas, J. T., Song, W., & Upadhyaya, A. (2018).  
629 Subcellular topography modulates actin dynamics and signaling in B-cells. *Molecular*  
630 *Biology of the Cell*, 29(14), 1732–1742. <https://doi.org/10.1091/mbc.E17-06-0422>

- 631 Köhler, S., Schmoller, K. M., Crevenna, A. H., & Bausch, A. R. (2012). Regulating Contractility  
632 of the Actomyosin Cytoskeleton by pH. *Cell Reports*, 2(3), 433–439.  
633 <https://doi.org/10.1016/j.celrep.2012.08.014>
- 634 Kriebel, P. W., Barr, V. A., & Parent, C. A. (2003). Adenylyl cyclase localization regulates  
635 streaming during chemotaxis. *Cell*, 112(4), 549–560. [https://doi.org/10.1016/S0092-](https://doi.org/10.1016/S0092-8674(03)00081-3)  
636 [8674\(03\)00081-3](https://doi.org/10.1016/S0092-8674(03)00081-3)
- 637 LaFratta, C. M., Li, L., & Fourkas, J. T. (2006). Soft-lithographic replication of 3D  
638 microstructures with closed loops. *Proceedings of the National Academy of Sciences of the*  
639 *United States of America*, 103(23), 8589–8594. <https://doi.org/10.1073/pnas.0603247103>
- 640 LaFratta, C. N., Baldacchini, T., Farrer, R. A., Fourkas, J. T., Teich, M. C., Saleh, B. E. A., &  
641 Naughton, M. J. (2004). Replication of two-photon-polymerized structures with extremely  
642 high aspect ratios and large overhangs. *Journal of Physical Chemistry B*, 108(31), 11256–  
643 11258. <https://doi.org/10.1021/jp048525r>
- 644 Lange, M., Prassler, J., Ecke, M., Müller-Taubenberger, A., & Gerisch, G. (2016). Local Ras  
645 activation, PTEN pattern, and global actin flow in the chemotactic responses of oversized  
646 cells. *Journal of Cell Science*, 129(18), 3462–3472. <https://doi.org/10.1242/jcs.191148>
- 647 Lee, R. M., Campanello, L., Hourwitz, M. J., Alvarez, P., Omidvar, A., Fourkas, J. T., & Losert,  
648 W. (2020). Quantifying topography-guided actin dynamics across scales using optical flow.  
649 *Molecular Biology of the Cell*, 31(16), 1753–1764. [https://doi.org/10.1091/mbc.e19-11-](https://doi.org/10.1091/mbc.e19-11-0614)  
650 [0614](https://doi.org/10.1091/mbc.e19-11-0614)
- 651 Lin, F., Baldessari, F., Gyenge, C. C., Sato, T., Chambers, R. D., Santiago, J. G., & Butcher, E.  
652 C. (2008). Lymphocyte Electrotaxis In Vitro and In Vivo. *The Journal of Immunology*,  
653 *181*(4), 2465–2471. <https://doi.org/10.4049/jimmunol.181.4.2465>

- 654 Martin, C., Pedersen, S. F., Schwab, A., & Stock, C. (2011). Intracellular pH gradients in  
655 migrating cells. *American Journal of Physiology - Cell Physiology*, *300*(3), 490–495.  
656 <https://doi.org/10.1152/ajpcell.00280.2010>
- 657 McLaughlin, S., & Poo, M. M. (1981). The role of electro-osmosis in the electric-field-induced  
658 movement of charged macromolecules on the surfaces of cells. *Biophysical Journal*, *34*(1),  
659 85–93. [https://doi.org/10.1016/S0006-3495\(81\)84838-2](https://doi.org/10.1016/S0006-3495(81)84838-2)
- 660 Meinhardt, H. (1999). Orientation of chemotactic cells and growth cones: Models and  
661 mechanisms. *Journal of Cell Science*, *112*(17), 2867–2874.  
662 <https://doi.org/https://doi.org/10.1242/jcs.112.17.2867>
- 663 Miao, Y., Bhattacharya, S., Banerjee, T., Abubaker Sharif, B., Long, Y., Inoue, T., Iglesias, P.  
664 A., & Devreotes, P. N. (2019). Wave patterns organize cellular protrusions and control  
665 cortical dynamics. *Molecular Systems Biology*, *15*(3), 1–20.  
666 <https://doi.org/10.15252/msb.20188585>
- 667 Miao, Y., Bhattacharya, S., Edwards, M., Cai, H., Inoue, T., Iglesias, P. A., & Devreotes, P. N.  
668 (2017). Altering the threshold of an excitable signal transduction network changes cell  
669 migratory modes. *Nature Cell Biology*, *19*(4), 329–340. <https://doi.org/10.1038/ncb3495>
- 670 Neumann, E., Gerisch, G., & Opatz, K. (1980). Cell fusion induced by high electric impulses  
671 applied to Dictyostelium. *Naturwissenschaften*, *67*(8), 414–415.  
672 <https://doi.org/10.1007/BF00405493>
- 673 Sato, M. J., Kuwayama, H., Van Egmond, W. N., Takayama, A. L. K., Takagi, H., Van Haastert,  
674 P. J. M., Yanagida, T., & Ueda, M. (2009). Switching direction in electric-signal-induced  
675 cell migration by cyclic guanosine monophosphate and phosphatidylinositol signaling.  
676 *Proceedings of the National Academy of Sciences of the United States of America*, *106*(16),

- 677           6667–6672. <https://doi.org/10.1073/pnas.0809974106>
- 678   Sato, M. J., Ueda, M., Takagi, H., Watanabe, T. M., Yanagida, T., & Ueda, M. (2007). Input-  
679           output relationship in galvanotactic response of Dictyostelium cells. *BioSystems*, 88(3),  
680           261–272. <https://doi.org/10.1016/j.biosystems.2006.06.008>
- 681   Srinivasan, S., Wang, F., Glavas, S., Ott, A., Hofmann, F., Aktories, K., Kalman, D., & Bourne,  
682           H. R. (2003). Rac and Cdc42 play distinct roles in regulating PI(3,4,5)P3 and polarity  
683           during neutrophil chemotaxis. *Journal of Cell Biology*, 160(3), 375–385.  
684           <https://doi.org/10.1083/jcb.200208179>
- 685   Sun, X., Hourwitz, M. J., Baker, E. M., Schmidt, B. U. S., Losert, W., & Fourkas, J. T. (2018).  
686           Replication of biocompatible, nanotopographic surfaces. *Scientific Reports*, 8(1), 1–9.  
687           <https://doi.org/10.1038/s41598-017-19008-z>
- 688   Tang, M., Wang, M., Shi, C., Iglesias, P. A., Devreotes, P. N., & Huang, C. H. (2014).  
689           Evolutionarily conserved coupling of adaptive and excitable networks mediates eukaryotic  
690           chemotaxis. *Nature Communications*, 5, 1–13. <https://doi.org/10.1038/ncomms6175>
- 691   Veltman, D. M., Williams, T. D., Bloomfield, G., Chen, B. C., Betzig, E., Insall, R. H., & Kay, R.  
692           R. (2016). A plasma membrane template for macropinocytic cups. *ELife*,  
693           5(DECEMBER2016), 24. <https://doi.org/10.7554/eLife.20085>
- 694   Wang, M. J., Artemenko, Y., Cai, W. J., Iglesias, P. A., & Devreotes, P. N. (2014). The  
695           directional response of chemotactic cells depends on a balance between cytoskeletal  
696           architecture and the external gradient. *Cell Reports*, 9(3), 1110–1121.  
697           <https://doi.org/10.1016/j.celrep.2014.09.047>
- 698   Weiner, O. D., Marganski, W. A., Wu, L. F., Altschuler, S. J., & Kirschner, M. W. (2007). An  
699           actin-based wave generator organizes cell motility. *PLoS Biology*, 5(9), 2053–2063.

- 700 <https://doi.org/10.1371/journal.pbio.0050221>
- 701 Xiong, Y., Huang, C. H., Iglesias, P. A., & Devreotes, P. N. (2010). Cells navigate with a local-  
702 excitation, global-inhibition-biased excitable network. *Proceedings of the National*  
703 *Academy of Sciences of the United States of America*, *107*(40), 17079–17086.  
704 <https://doi.org/10.1073/pnas.10112711107>
- 705 Xu, J., Wang, F., Van Keymeulen, A., Herzmark, P., Straight, A., Kelly, K., Takuwa, Y.,  
706 Sugimoto, N., Mitchison, T., & Bourne, H. R. (2003). Divergent signals and cytoskeletal  
707 assemblies regulate self-organizing polarity in neutrophils. *Cell*, *114*(2), 201–214.  
708 [https://doi.org/10.1016/S0092-8674\(03\)00555-5](https://doi.org/10.1016/S0092-8674(03)00555-5)
- 709 Zhan, H., Bhattacharya, S., Cai, H., Iglesias, P. A., Huang, C. H., & Devreotes, P. N. (2020). An  
710 Excitable Ras/PI3K/ERK Signaling Network Controls Migration and Oncogenic  
711 Transformation in Epithelial Cells. *Developmental Cell*, *54*(5), 608-623.e5.  
712 <https://doi.org/10.1016/j.devcel.2020.08.001>
- 713 Zhao, M., Jin, T., McCaig, C. D., Forrester, J. V., & Devreotes, P. N. (2002). Genetic analysis of  
714 the role of G protein-coupled receptor signaling in electrotaxis. *The Journal of Cell Biology*,  
715 *157*(6), 921–927. <https://doi.org/10.1083/jcb.200112070>
- 716 Zhao, M., Song, B., Pu, J., Wada, T., Reid, B., Tai, G., Wang, F., Guo, A., Walczysko, P., Gu, Y.,  
717 Sasaki, T., Suzuki, A., Forrester, J. V., Bourne, H. R., Devreotes, P. N., McCaig, C. D., &  
718 Penninger, J. M. (2006). Electrical signals control wound healing through  
719 phosphatidylinositol-3-OH kinase- $\gamma$  and PTEN. *Nature*, *442*(7101), 457–460.  
720 <https://doi.org/10.1038/nature04925>
- 721 Zhou, H. X., & Pang, X. (2018). Electrostatic Interactions in Protein Structure, Folding, Binding,  
722 and Condensation. *Chemical Reviews*, *118*(4), 1691–1741.

723 <https://doi.org/10.1021/acs.chemrev.7b00305>

724

725 **Funding**

726 **Air Force Office of Scientific Research grant (FA9550-16-1-0052)**

- 727 • Qixin Yang
- 728 • Yuchuan Miao
- 729 • Leonard J. Campanello
- 730 • Matt J. Hourwitz
- 731 • Bedri Abubaker-Sharif
- 732 • Abby L. Bull
- 733 • Peter N. Devreotes
- 734 • John T. Fourkas
- 735 • Wolfgang Losert

736 **National Insitute of Health (T32 GM136577)**

- 737 • Bedri Abubaker-Sharif

738

739 The funders had no role in study design, data collection, and interpretation, or the decision to  
740 submit the work for publication.

741



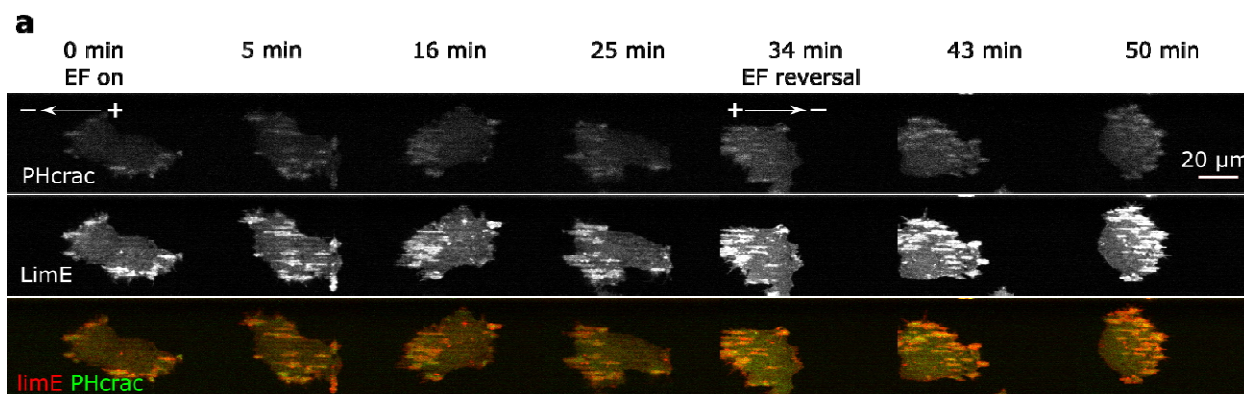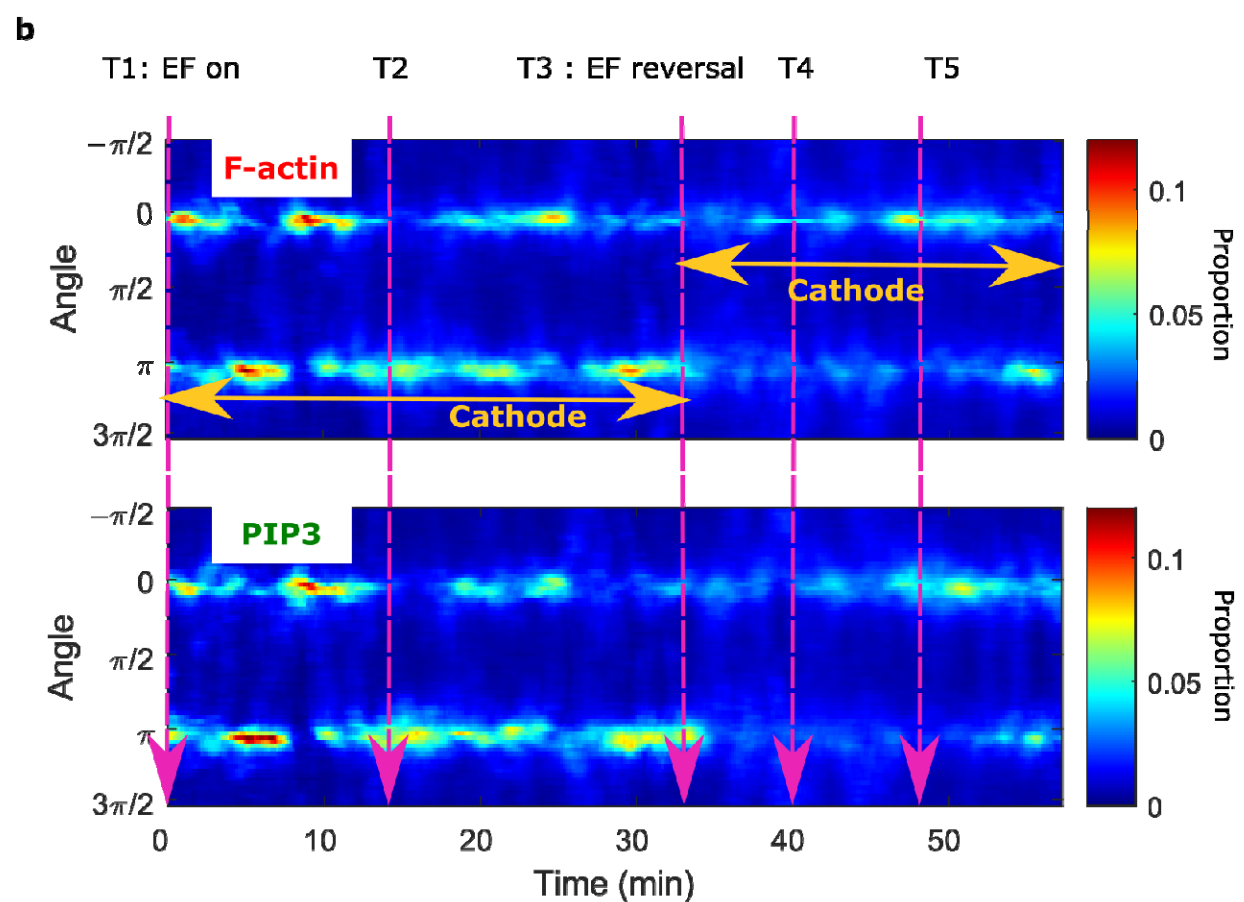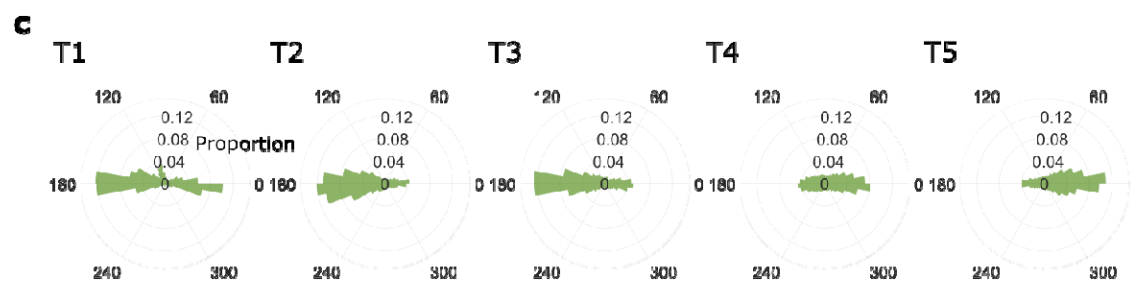

742

743 **Fig. 1 – figure supplement 1. Colocalization of PIP3 and F-actin in an EF. a. Images of**

744 PHcrac (top row) and LimE (middle row) in a 20 V/cm EF with the cathode located on the left.  
745 The EF was turned on at 0 min and reversed at 34 min. From the combined images (bottom row),  
746 it is clear that F-actin and PIP3 remained coordinated during electrotaxis. **b.** Kymograph of  
747 angular distribution of F-actin (top) / PIP3 (bottom) wave motion. Optical-flow analysis was  
748 applied to both the F-actin and PIP3 videos to measure wave motion. Then we stacked up the  
749 angular distribution at each time point along the  $x$ -axis. The dynamics of F-actin/PIP3 in  
750 response to EFs are similar. The color was coded according to the proportion of each bin in the  
751 angular distribution. **c.** Polar plots of angular distributions from the time points specified in b.

752

753

754

755

756

757

758

759

760

761

762

763

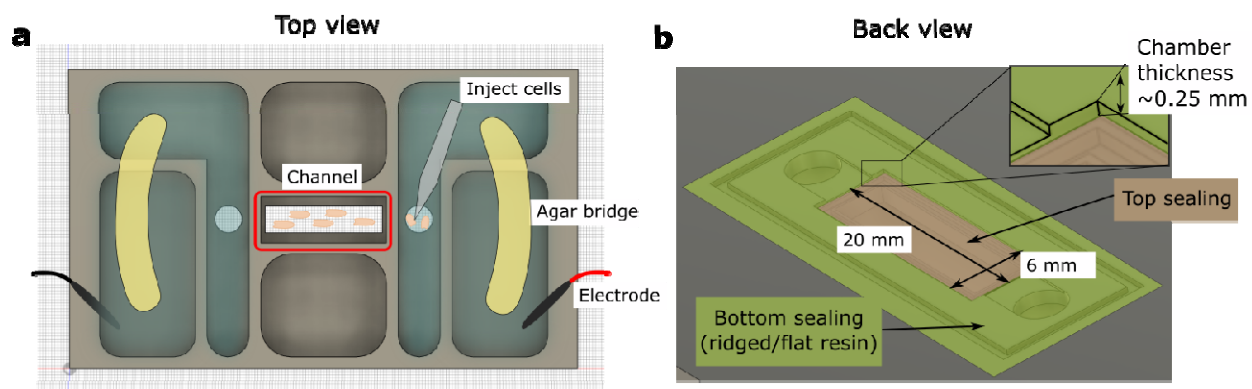

764

765 **Fig. 2 – figure supplement 1. Schematic of the 3D-printed chamber used for electrotaxis**

766 **experiments. a.** Top view of the experimental setup. **b.** Back view of the setup. Agar bridges

767 isolate the cell media from electrodes to avoid changes in pH and the generation of

768 electrochemical products. The cells were injected using pipettes into the center channel (red box

769 highlighted in a). The height of the electrotaxis channel is ~0.25 mm. The channel was sealed

770 with a large substrate coverslip and a smaller top coverslip.

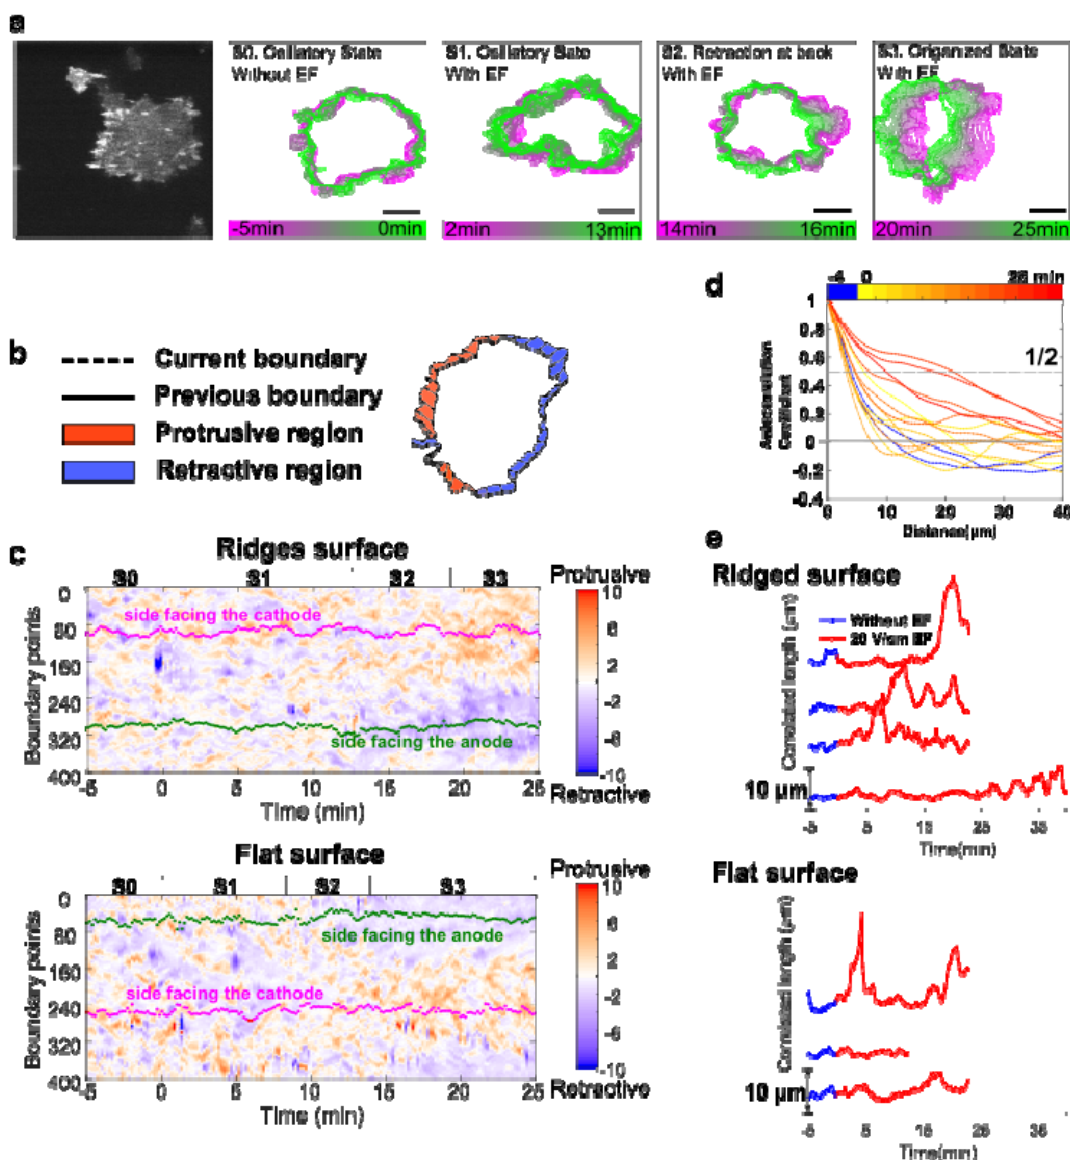

771 Fig. 2 – figure supplement 2. EFs induce keratocyte-mode migration, producing larger  
 772 protrusions at cell fronts. **a**. Shape dynamics of a giant *D. discoideum* cell at 10 s intervals. Cell  
 773 boundaries were outlined using an active contour algorithm. Boundaries are color-coded  
 774 according to time. Four stages were categorized: (S0) Random motion in the absence of an EF.  
 775 (S1) Random motion in the first 15 min in the presence of an EF. (S2) Transition state usually  
 776 with a retraction at the back. (S3) Steady migration state in the presence of an EF. **b**. A  
 777 schematic of local protrusion and retraction, where the solid line is the current frame, and the  
 778 dotted line represents the cell boundary 1 min later. A protrusive region (yellow) is defined as

779 one occupied in the new frame, not in the previous frame, and a retractive region (blue) is  
780 defined as one occupied in the previous frame, not in the new frame. **c.** Kymograph of local  
781 boundary motion. The  $x$ -axis represents time, the  $y$ -axis indicates boundary points, and the color  
782 of each pixel corresponds to the speed. **d.** Correlation curves of boundary motion at different  
783 time points. **e.** Correlation length (defined as the point at which curves in d reach a value of 1/2)  
784 vs. time. Each curve represents an independent experiment conducted on a different day.

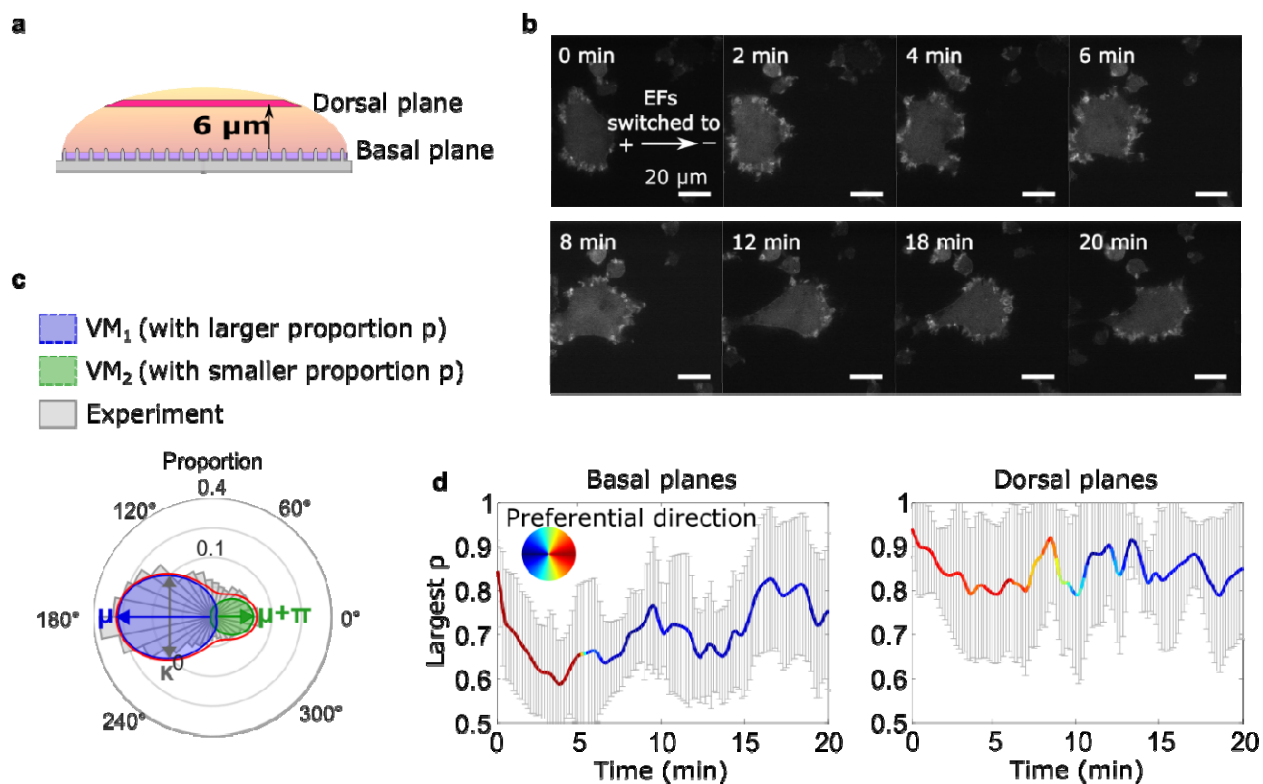

785 **Fig. 3 – figure supplement 1. Basal actin waves reverse direction on nanoridges, whereas**  
 786 **dorsal waves turn.** **a.** A schematic showing the two imaging planes used, with the morphology  
 787 of the substrate. **b.** LimE-RFP images recorded at the dorsal plane. Unlike the basal focal plane  
 788 images, which capture the complete basal wave dynamics, the dorsal plane images do not capture  
 789 the full dorsal wave motion. To avoid photobleaching and laser damage, we only imaged the  
 790 cross-section of the dorsal waves and tracked the cross-sections using optical-flow analysis.  
 791 **c.** A schematic introducing 4-parameter, bimodal von Mises (vM) fitting. The orientation  
 792 distribution (gray) was fitted to a bimodal vM distribution at each time point. The two vM  
 793 distributions were set to share the degree of concentration  $\kappa$  ( $\kappa_1 = \kappa_2$ ), peak locations  $\mu$  that were  
 794 set to be  $\mu_1 = \mu_2 + 180^\circ$ . **d.** Temporal evolution of fitting parameters in response to  
 795 EF reversal. Among two fitted vM distributions, the one with a larger proportion (vM<sub>p</sub>) was  
 796 tracked. For both plots, the curves represent the mean  $p$  of vM<sub>p</sub> with standard derivations from  
 797 multiple experiments ( ), and the colors represent the  $\mu$  of vM<sub>p</sub>.

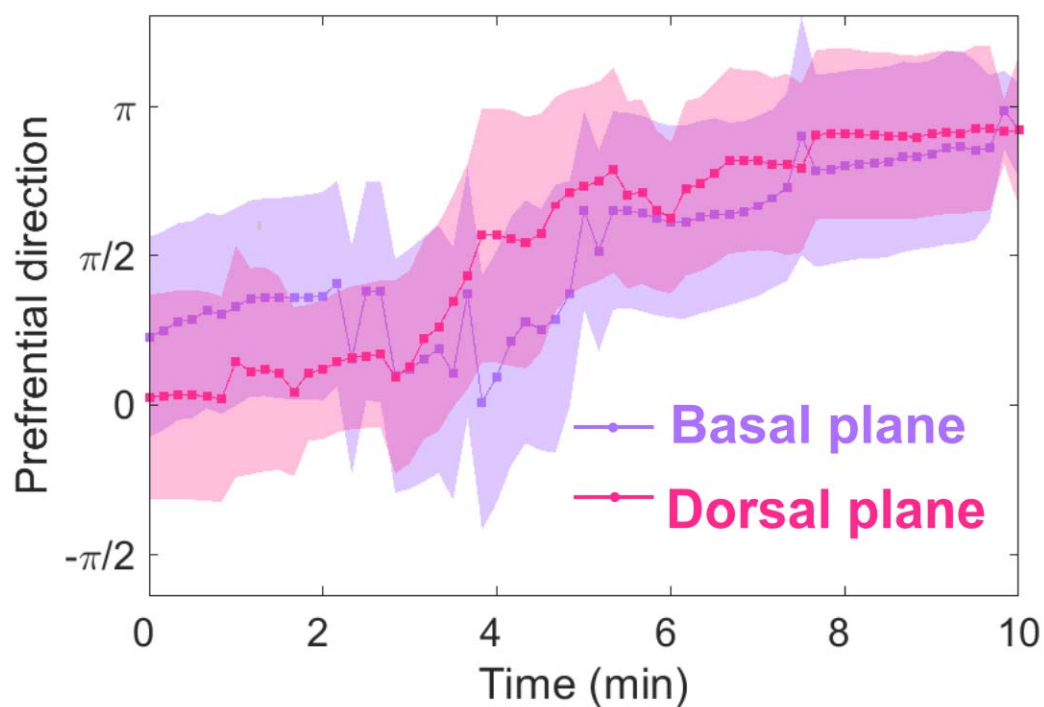

798 **Fig. 3 – figure supplement 2. Basal and dorsal waves on flat surfaces both turn in response**  
799 **to EF reversal.** Temporal evolution of cosine function of the fitted preferential direction of actin  
800 wave propagation for giant cells on flat surfaces. The analysis was based on  $N = 3$  experiments.

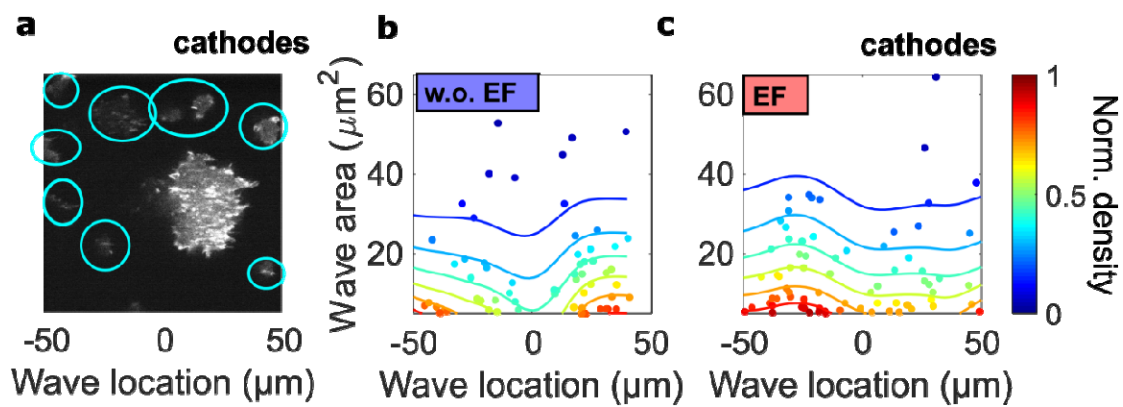

801



802 **Fig. 4 – figure supplement 1. The spatial inhomogeneity of wave properties could be caused**  
803 **either by the EF or by the external electrical potential gradient relative to the ground.** To  
804 explore these scenarios, we quantified the waves in single cells surrounding the giant cell in the  
805 field of view, where the center of the field was defined as the origin. In contrast to the giant cells,  
806 these single cells are scattered throughout the field of view but are not large enough for the  
807 potential gradient to create significant intracellular polarization. Thus, if the spatial  
808 inhomogeneity is caused by the external electrical potential gradient, we would observe a  
809 gradient of wave properties from single cells located in the region between  $-50\ \mu\text{m}$  and  $50\ \mu\text{m}$ . **a.**  
810 A limE image. Single cells are highlighted with blue circles. **b, c.** Density scatter plots of wave  
811 location vs. wave area for single cells (highlighted by blue circles in a) in the absence (b) and the  
812 presence (c) of EF. Unlike in giant cells (Fig. 4a, 4b), the wave areas in single cells are spatially  
813 homogeneous. The ratio of mean wave areas in the regions nearer the cathode (location  $> 0$ ) to  
814 those in regions farther from the cathodes (location  $< 0$ ) was calculated for both single cells and  
815 giant cells. In giant cells, this ratio increases from 0.85 to 2.00 with an EF (Fig. 4a), whereas for  
816 single cells, the ratio is almost unchanged (1.08 without an EF and 0.98 with an EF). This  
817 analysis was based on the experiments from 4 different days.

818 Figure 4 – figure supplement 1- source data 1. Related to Fig. 4 – figure supplement 1.

819

820

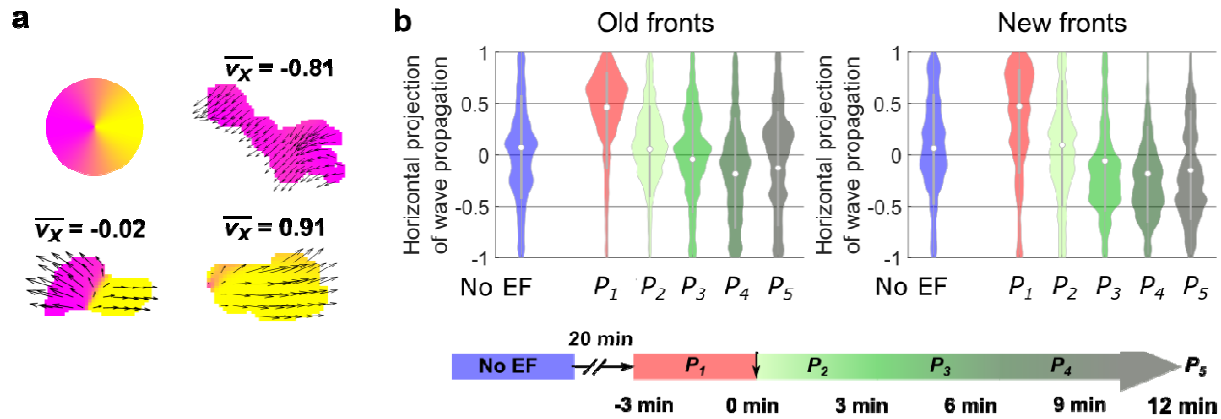

821

822 **Fig. 4 – figure supplement 2. Analysis of the propagation of individual waves.** **a.** Illustration

823 of analysis of the propagation of individual waves. We first segmented each wave. For all of the

824 optical-flow vectors within the wave region, we normalized the magnitudes and then calculated

825 the  $x$  projection of their resultant vector (  $\overline{v_x} = \frac{\sum v_i \cos \theta_i}{N}$  ) where  $\theta_i$  is the orientation of

826 optical-flow vector  $v_i$ . For waves propagating unidirectionally,  $\overline{v_x}$  is close to  $\pm 1$ , whereas for

827 waves extending bidirectionally,  $\overline{v_x}$  is close to 0. **b.** Violin plots of  $\overline{v_x}$  of waves near old and

828 new fronts, at different time windows illustrated by the bottom timeline. The violin plots show

829 the distribution of  $\overline{v_x}$  weighted by wave area, and the centered boxplot (gray bars) show the

830 without any weighting. The analysis was based on  $N = 7$  experiments performed over 4 different

831 days. As the plots show, individual waves in the old fronts reversed their directions towards new

832 cathodes (both violin plot and boxplot shift their centers towards  $< 0$  region) after 9 min (  $P_4$  ).

833 While for waves in the new fronts, larger waves shifted their directions to new cathode within 6

834 min (violin plot shifts to  $< 0$  at  $P_2$  ), and smaller wave response time is comparable to waves in

835 the old fronts (boxplot shifts to  $< 0$  at  $P_3$  ).

836 Figure 4 – figure supplement 2- source data 1. Related to Fig. 4 – figure supplement 2b.

837
